# Supplementary material
Source: PubMed Central journal article supplement (PMC2735448)
Supplement: NIHMS132286-supplement-supplement_1.pdf [file NIHMS132286-supplement-supplement_1.pdf]

## Supporting Online Material

### Materials and Methods

#### Strains

*C. elegans* strains were cultured at 20°C as described (1), unless otherwise indicated. Wild-type animals were Bristol strain N2. Other alleles used in this work were: LGV: *ttx-1(p767)*, *osm-6(p811)*, *fig-1(tm2079)*; LGX: *che-2(e1033)*. The following transgenic arrays were used:

“no glia 1” *nsIs109* [F16F9.3 pro::DT-A(G53E) + *unc-122* pro::GFP],  
“no glia 2” *nsIs113* [F16F9.3 pro::DT-A(G53E) + *unc-122* pro::GFP] X,  
*cbIs1* [*vap-1* pro::nlsGFP + *lin-15(+)*] I,  
*kyIs90* [*odr-3* pro::*odr-3*(1<sup>st</sup> 35 aa’s)::GFP + *lin-15(+)*] III,  
*ntIs1* [*gcy-5* pro::GFP + *lin-15(+)*] V,  
*oyIs17* [*gcy-8* pro::GFP + *lin-15(+)*] V,  
*oyIs45* [*odr-1* pro::RFP] V,  
*kyIs156* [*str-1* pro::*odr-10*::GFP] X,  
*oyIs51* [T08G3.3 pro::RFP],  
*kyEx728* [*sra-6* pro::G-CaMP],  
*kyEx1440* [*sra-6* pro::*chop2*::Cherry + *elt-2* pro::GFP],  
*kyEx1449* [*sra-6* pro::*chop2*::Cherry + *elt-2* pro::GFP],  
*myEx10* [*che-11* pro::*che-11*::GFP, *rol-6(su1006)*],  
*nsEx1705* [*dyf-11* pro::*dyf-11*::GFP, *rol-6(su1006)*],  
*nsEx856* [F16F9.3 pro::GFP, *rol-6(su1006)*],  
*nsEx864* [F11C7.2 pro::GFP, *rol-6(su1006)*],  
*nsEx1066* [F53F4.13 pro::GFP, *rol-6(su1006)*],  
*nsEx1086* [T02B11.3 pro::GFP, *rol-6(su1006)*],  
*nsEx1758* [*fig-1* pro::GFP, *rol-6(su1006)*],  
*nsEx2192* [C38G2, *rol-6(su1006)*],  
*nsEx2209* [*fig-1* pro::*fig-1* (long), *exp-1* pro::GFP],  
*nsIs184* [*fig-1* pro::*fig-1* (short), *exp-1* pro::GFP],  
*nsEx2155* [T02B11.3 pro::*fig-1* (short), *exp-1* pro::GFP],  
*nsEx2150* [*sra-6* pro::*fig-1* (short), *exp-1* pro::GFP],  
*nsEx2212* [*sra-6* pro::*odr-10*::GFP, *rol-6(su1006)*, pSL1180],  
*nsEx2215* [*odr-1* pro::*odr-10*::GFP, *rol-6(su1006)*, pSL1180],  
*nsEx2218* [*odr-10* pro::*odr-10*::GFP, *rol-6(su1006)*, pSL1180],  
*nsEx2221* [*odr-1* pro::*tax-4*::GFP, *rol-6(su1006)*, pSL1180],  
*nsEx2224* [*odr-1* pro::*tax-4*::GFP, *rol-6(su1006)*, pSL1180].

*P<sub>exp-1</sub>*-GFP was kindly provided by Eric Jorgensen (2), pSL1180 is an empty cloning vector used to increase the DNA concentration of injection mixtures. Germline transformations were performed as described (3). Stable transgenes were obtained via psoralen integration (4).

### *Ablations*

Laser ablations were performed as described (5) in L1 larvae of a strain expressing GFP in amphid sheath glia (*cbIs1*). Ablation success was determined by lack of GFP expression and also confirmed in eight animals by EM reconstruction. All cilia morphologies were determined in laser ablated animals as well as transgenic lines lacking glia. An attenuated form of diphtheria toxin A was expressed specifically within amphid and phasmid sheath cells using the F16F9.3 promoter region to kill these cells genetically. Transgenic animals carrying pTB29 [F16F9.3 pro::DT-A(G53E)], injected at 2 ng/ $\mu$ L, and pEP51 [*unc-122* pro::GFP], a gift of Elliot Perens, were obtained by germline injection followed by psoralen integration. In the two lines characterized, “no glia 1” (*nsIs109*) and “no glia 2” (*nsIs113*), the amphid sheath glia appear to die in late embryos or in early L1 larvae. Laser-ablated animals were tested in NaCl chemotaxis and osmosensation assays and they performed similarly to genetically-ablated animals, indicating that the two ablations are essentially equivalent.

### *Behavioral analysis*

NaCl chemotaxis and odortaxis assays were performed as previously described (6, 7). Attractants were assayed on circular plates; repellents and diacetyl in the experiment shown in Fig. 1G were assayed on square plates. All data shown is from 12 assays. The ring assay was used to test osmosensation (8). Briefly, a 1-cm ring of 4 M fructose containing the dye Congo Red was made on an NGM plate. Animals were placed inside the ring and followed over the next 10 min to determine the response to the osmotic barrier. Animals avoiding the ring more than six times were classified as normal; those exiting the ring in less than six attempts were deemed defective in osmosensation.

Thermotaxis assays were performed on a 18°-26°C linear temperature gradient (9). Animals were allowed to lay for 8-24 hours and removed from plates. The staged progeny were tested on the first day of adulthood. Briefly, animals were washed twice with S-Basal and spotted onto a 10-cm plate containing 12 mL of NGM agar. The plate was placed onto the temperature gradient with the addition of 1 mL glycerol to its bottom to improve thermal conductivity. The plate was covered with a flat piece of glass. The assay was stopped after 45 min by inverting the plate over chloroform thus killing the animals. The plates have an imprinted 6x6 square pattern which formed the basis of the 6 temperature bins. The data shown is the average of four assays.

### *Dye filling*

Stock solutions (5 mg/mL) of 1,1'-dioctadecyl-3,3,3',3'-tetramethylindocarbocyanine perchlorate (DiI) in *N,N*-dimethylformamide were stored at -20°C. To assay dye uptake, animals were soaked in 5  $\mu$ g/mL DiI diluted in M9 for 20-60 min.

### *Microscopy and Imaging*

GFP expression patterns were analyzed in stable transgenic lines by conventional fluorescence microscopy using an Axioplan II microscope equipped with an AxioCam camera. Alternatively, imaging was performed on a Zeiss Axiovert 200M microscope equipped with an UltraView spinning disk confocal head using a 100x/1.45 NA objective.

Calcium imaging was performed using a microfluidic device as described (10). Images were captured at 10 frames/sec and were analyzed using MetaMorph and Matlab (10).

#### *Electron Microscopy*

Animals were fixed, stained, embedded in resin, and serially sectioned using standard methods (11). Imaging was performed with a transmission electron microscope equipped with a digital camera.

#### *Channelrhodopsin2*

An overnight culture (5mL) of *E. coli* (strain OP50) was pelleted and concentrated to 50  $\mu$ L. To this, 1  $\mu$ L of 50 mM retinal (a gift of Navin Pokala and Cori Bargmann) was added. After vortexing, the mixture was spotted in NGM plates. Animals expressing ChR2-mCherry were transferred and cultivated on these plates for at least 2 hours. Animals were assayed on a dissecting microscope by exposing them for about 1 second to excitation light using a GFP Plant fluorescence filter 470/40nm. Animals initiating backward movement within 2 seconds were scored responsive. The animals were not responding to UV light per se as omission of retinal, a channelrhodopsin2 obligate cofactor, resulted in unresponsive animals.

#### *Cell Culture*

Embryonic cells were obtained using methods previously described (12, 13). Briefly, embryos were isolated from gravid adults following lysis in a hypochlorite solution. Eggs released by this treatment were pelleted by centrifugation and washed with sterile egg buffer containing 118 mM NaCl, 48 mM KCl, 2 mM CaCl<sub>2</sub>, 2 mM MgCl<sub>2</sub>, and 25 mM HEPES (pH 7.3). Eggshells were removed by incubation in 5 ml chitinase (0.5 U/ml in egg buffer) for 45 minutes. Embryos were pelleted by brief centrifugation, and the egg buffer was removed and replaced with 2 ml L-15 medium supplemented with 10% FBS, 50 U/ml penicillin and 50  $\mu$ g/ml streptomycin. The osmolarity of the culture medium was adjusted to 340 mOsm with sucrose.

The embryos were dissociated by passage through a 5 $\mu$ m syringe filter. Cells were plated on poly-L-lysine (0.01%) coated cell culture dishes at a density of 10<sup>7</sup> cells/ml and maintained in L-15 media at 22°C in a humidified chamber. The cells were cultured for 24 hr to allow differentiation of GFP-labeled amphid sheath cells. The *vap-1::GFP* transgene used also drives faint expression in the AFD neuron.

#### *FACS analysis*

Sorting experiments were performed on a FACSVantage SE/DiVa, equipped with a 488 nm laser. The machine was flushed with egg buffer prior to sorting to enhance cell

viability. Autofluorescence levels were established by flow cytometry of cells isolated from the non-GFP-expressing wild-type strain (N2). The sorting gate for size and granularity was empirically adjusted to exclude cell clumps and debris and to achieve ~95% enrichment for GFP-labeled cells, which represented 0.1% of the total cell count. The cells were collected directly into RNA extraction buffer. As a reference, equal amounts of non-GFP cells were collected by FACS for RNA isolation.

#### *Isolation and amplification of RNA*

For each experiment, mRNA was isolated from 90,000 - 120,000 cells using the Absolutely RNA microprep kit. 90-150 ng of obtained total RNA was subjected to linear amplification, fragmentation and biotin labeling using the Ovation™ Biotin RNA Amplification and Labeling System as recommended by the manufacturer. The quality and size distribution of obtained cDNA were assessed by gel electrophoresis.

#### *Array hybridization and data analysis*

mRNA isolated and amplified in three independent experiments was hybridized to GeneChip *C. elegans* Genome Arrays containing 22,500 predicted transcripts. 5 µg of fragmented cDNA were used for each hybridization. The GeneSpring software was used to carry out data analysis. For the probe intensity values generated by the Affymetrix scanner, Robust Multichip Average algorithm was used for normalization and statistical processing. Data were then filtered to remove genes with low expression values (<10). t-test was performed to sequentially filter out genes with unreliable signal level between replicates ( $p < 0.05$ ). Finally, genes were filtered for fold change.

#### *RNAi*

RNAi was performed as described using published clones (14). To screen the candidate genes, 4 L4 larvae were placed on seeded RNAi plates and their progeny screened after 4 days by dye filling.

#### *Plasmid Constructions*

Initial attempts to clone PCR-amplified *fig-1* cDNA into standard vectors failed to yield *E. coli* transformants with the expected inserts, apparently because the cDNA is toxic to *E. coli*. The toxicity problem was resolved by creating expression vector pMT1, which has minimal transcriptional activity. Specifically, the *SphI*-*ApaI* fragment of pPD95-75 (15) was replaced with pBS-KS Multiple Cloning Site Region without flanking T7 and T3 promoters. To facilitate cDNA expression, the *unc-54* 3'UTR was amplified by PCR from pPD95-75 and the resulting amplicon was ligated to the above plasmid digested with *Sall* and *ApaI*.

FIG-1 isoforms: Two predicted isoforms of F53B7.5 (*fig-1*) are annotated (wormbase.org, release 190). While we could isolate cDNA for the short isoform, we could not amplify cDNA of the long isoform. PCR-amplification from several cDNA libraries resulted in isolation of clones that contained the last 4 exons spliced to each other, but these were not properly spliced to the rest of the gene and should not result in

successful translation. Conservation of these last 4 exons in other species leads us to believe that they are likely to be part of the gene locus. It is possible that the long form is only spliced under certain conditions which were not represented in the animals used to make the cDNA libraries.

For pMT2, *fig-1* cDNA (short) was amplified by PCR from cDNA and digested with *NotI* and *XhoI*. The resulting amplicon was ligated to pMT1 digested with *NotI* and *Sall*.

For P<sub>*fig-1*</sub>GFP (pMT3), we PCR-amplified a 5.2 kb genomic DNA fragment containing sequences upstream of the *fig-1* ATG. The resulting amplicon was ligated to pPD95-75 digested with *SphI* and *KpnI*. This construct also gave faint expression in two pairs of ventral cord projecting neurons. This neuronal expression is not seen when using a 2.2 kb promoter region.

For P<sub>F16F9.3</sub>GFP (pMT4), we PCR-amplified a 2 kb genomic DNA fragment containing sequences upstream of the predicted ATG. The resulting amplicon was ligated to pPD95-75 digested with *HindIII* and *KpnI*.

For P<sub>F53F4.13</sub>GFP (pMT5), we PCR-amplified a 650 bp genomic DNA fragment containing sequences upstream of the predicted ATG. The resulting amplicon was ligated to pPD95-75 digested with *HindIII* and *KpnI*.

For P<sub>T02B11.3</sub>GFP (pMT6), we PCR-amplified a 2.5 kb genomic DNA fragment containing sequences upstream of the predicted ATG. The resulting amplicon was ligated to pPD95-75 digested with *SphI* and *KpnI*.

For P<sub>F11C7.2</sub>GFP (pMT7), we PCR-amplified a 350 bp genomic DNA fragment containing sequences upstream of the predicted ATG. The resulting amplicon was ligated to pPD95-75 digested with *HindIII* and *KpnI*.

For P<sub>*fig-1fig-1*</sub> (pMT8), we PCR-amplified a 2.2kb genomic DNA fragment containing sequences upstream of *fig-1* ATG. The resulting amplicon was ligated to pMT2 digested with *SacI* and *NotI*.

For P<sub>*sra-6fig-1*</sub> (pMT10), we PCR-amplified a 2.4kb genomic DNA fragment containing sequences upstream of *sra-6* ATG. The resulting amplicon was ligated to pMT2 digested with *SacI* and *NotI*.

For P<sub>T02B11.3</sub>*fig-1* (pMT11), we PCR-amplified a 2.5kb genomic DNA fragment containing sequences upstream of the predicted ATG. The resulting amplicon was ligated to pMT2 digested with *SacI* and *NotI*.

For  $P_{fig-1}fig-1$  long (pMT15), we PCR-amplified the genomic region containing the last 5 exons of *fig-1* (long isoform). This was ligated into pMT8 taking advantage of an endogenous *BspEI* site in the last exon of the short isoform.

For  $P_{F16F9.3}DT-A(G53E)$  (pTB29), we performed site-directed mutagenesis on pJF142 [ $P_{unc-122}DT-A(K52E)$ ], a gift of Hanna Fares (16), to obtain the diphtheria toxin A G53E mutant. Additionally, we found that DT-A also contained the D79G mutation. The 2056 bp region upstream of the F16F9.3 start site (-2057 to -1, relative to the ATG), was PCR-amplified and ligated as a *PstI/BamHI* fragment into the vector generated by site-directed mutagenesis.

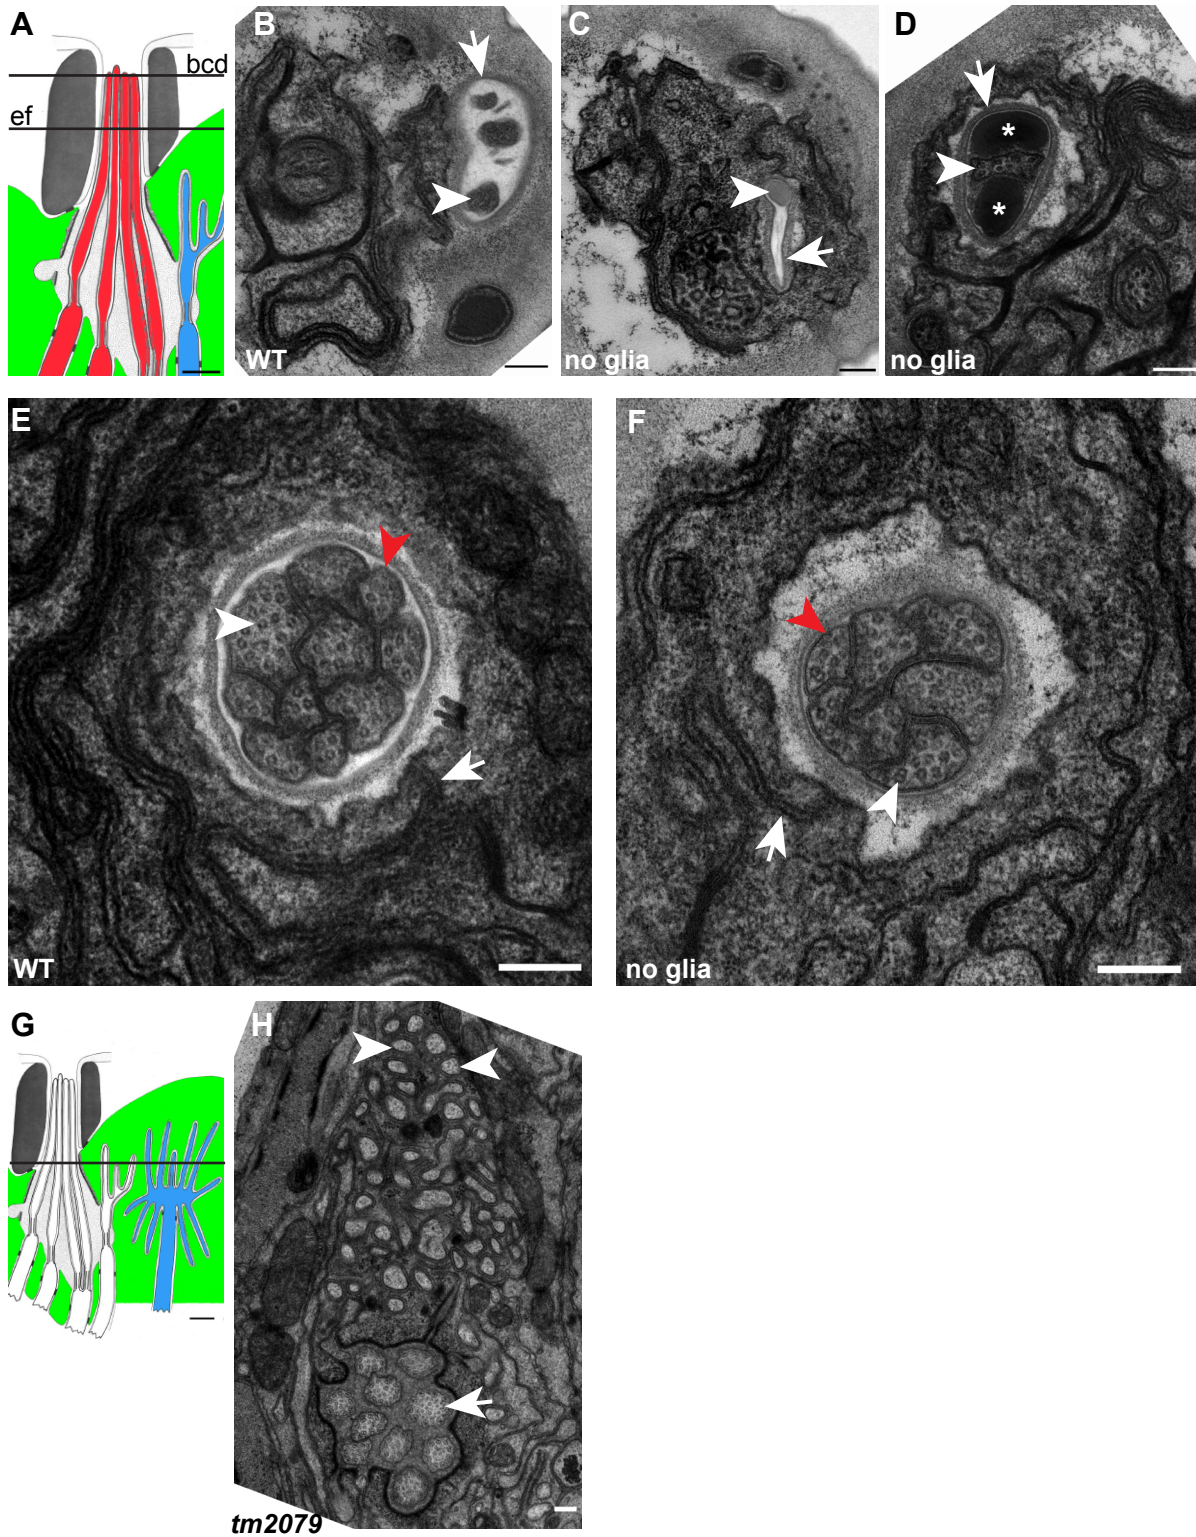

**Fig. S1.** Channel neuron cilia are not affected by glia removal. (A) A schematic depiction of the amphid opening indicating the level of the cross sections in B to F. Adapted from (18).

Sheath glia, green; socket glia forming the pore, dark grey; channel neurons, red; sheath embedded neurons, blue. In the cartoons, anterior is up, scale bar, 1  $\mu\text{m}$ . **(B)** The amphid opening of a wild-type animal. The beginning of a cilium (arrowhead) is seen in the cuticle-bound channel (arrow). **(C)** A glia-ablated animal in which the amphid channel appears open. **(D)** Another glia-ablated animal in which the beginning of a cilium is seen (arrowhead). An abnormal EM-dense matrix (asterisk) is seen within the channel. This matrix does not cause the dye-filling defects observed in glia-ablated animals as in some animals the socket channel is unobstructed (see **C**) but 100% of the animals are dye-filling defective. Furthermore, the channel opening is completely normal in *fig-1(tm2079)* mutants, which also exhibit dye filling defects. This matrix is also not the cause of the behavioral defects observed, as glia-ablated animals are defective in avoidance of volatile compounds such as 1-octanol which do not require an open channel for entry. Specifically, we tested *daf-6(e1377)* animals, in which the channel cilia cannot access the environment and are embedded within the sheath (17), and found them to avoid 1-octanol (chemotaxis index -0.43) much better than glia-ablated animals (average chemotaxis index -0.10). **(E)** Wild-type channel cilia (red arrowhead) displaying the proper microtubule (arrowhead) arrangement. Note that the amphid socket glia is not affected by the ablation. The characteristic junction that the socket forms unto itself is indicated by the arrow. **(F)** Glia-ablated animals also have normal channel cilia (red arrowhead) with normal microtubules (arrowhead). **(G)** Amphid cartoon with the AFD neuron shown in blue, note the villi-like projections at the level of the cross section. **(H)** In *fig-1(tm2079)* animals, the AFD villi appear normal (arrowhead) as do the channel cilia (arrow). In EM images, dorsal is up; scale bar, 200 nm.



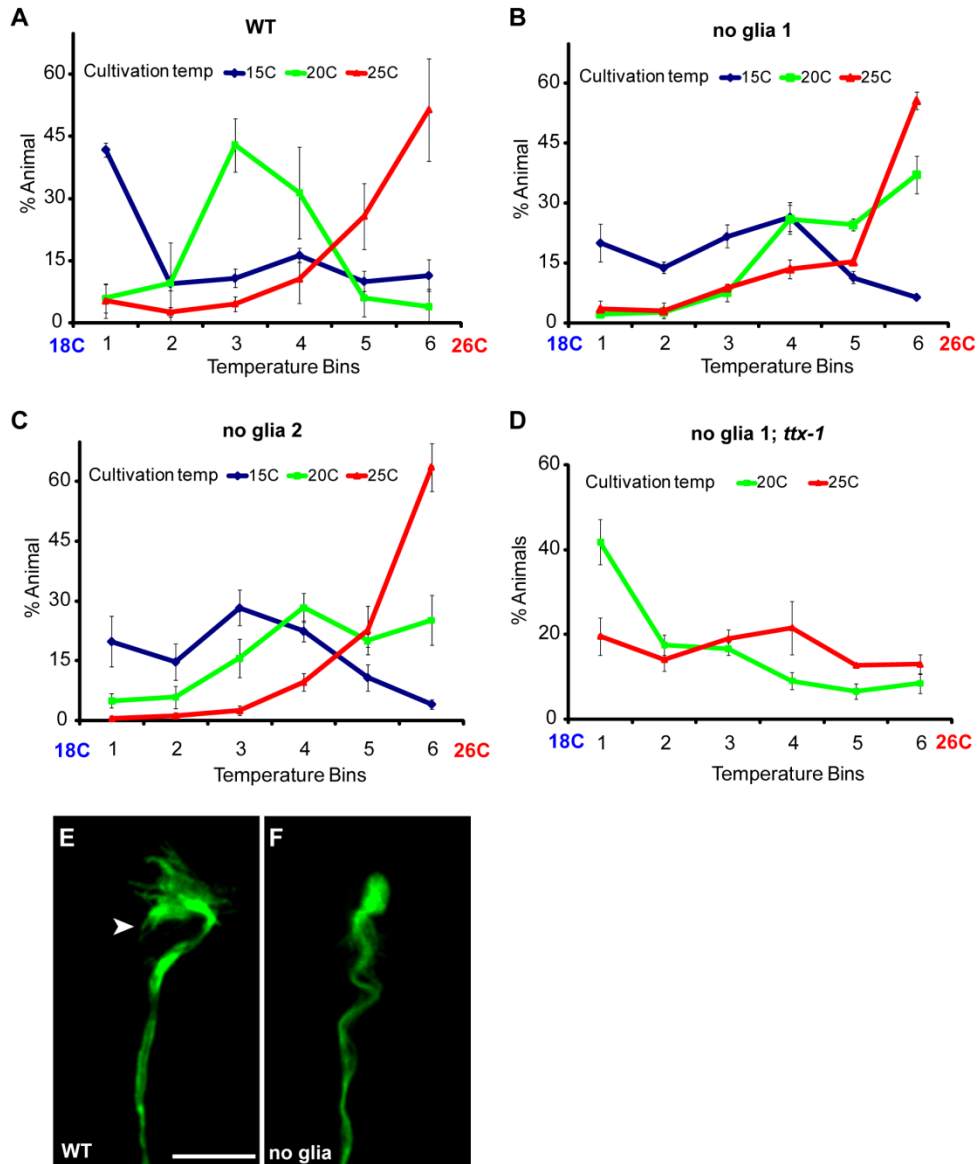

**Fig. S2.** AFD functional and morphological defects in glia ablated animals. **(A)** Thermotaxis profile of wild-type animals cultivated at three different temperatures. **(B and C)** Glia ablated animals fail to migrate to their cultivation temperature, especially if grown at 20°C, and thermotax to warmer temperatures. **(D)** Glia-ablated *ttx-1(p767)* animals migrate to cold temperatures, the reported behavior of *ttx-1(p767)* animals. **(E and F)** Glia-ablated animals lack the AFD villi seen in wild-type animals (arrowhead). Scale bar, 5  $\mu$ m.

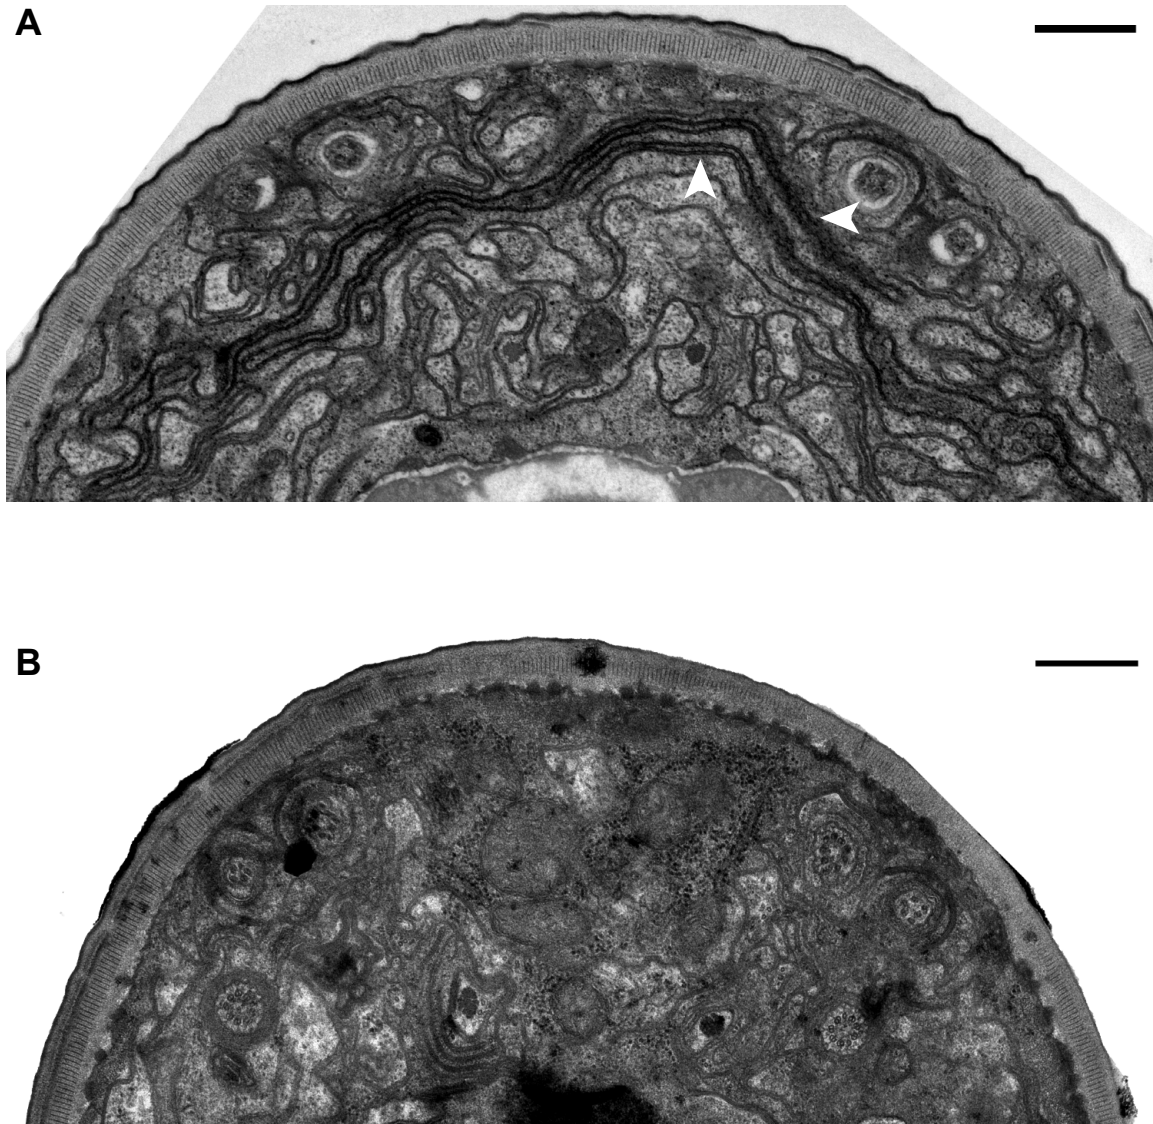

**Fig. S3.** AWC fails to extend wing-like cilia during dauer in absence of glia. **(A)** EM image of a wild-type dauer animal in cross section. Two overlapping AWC wings can be seen, arrowheads. **(B)** A glia-ablated animal (*nsIs109*) at the same cross section level has no AWC cilia extensions. Dorsal is up. Scale bar, 500 nm.

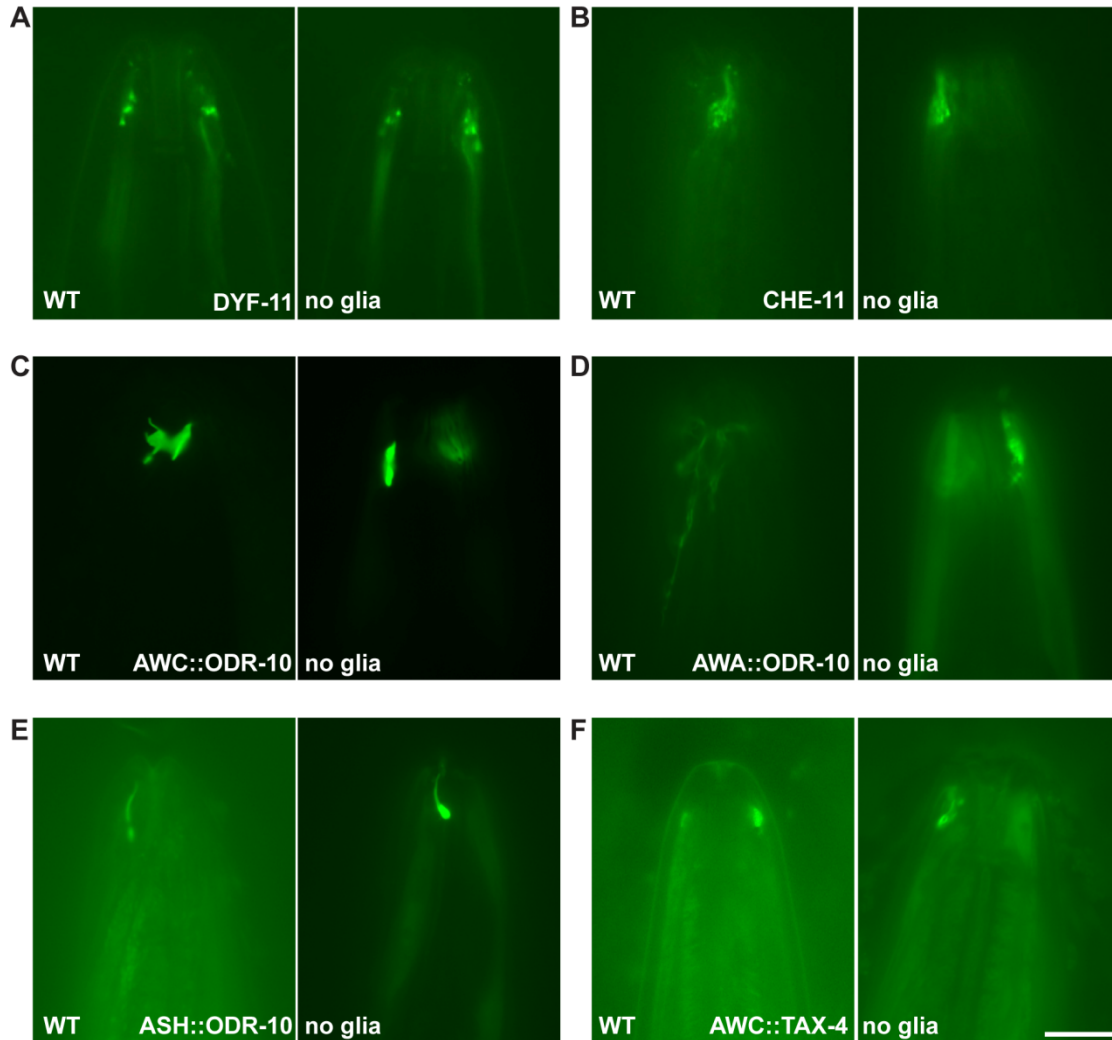

**Fig. S4.** Cilia components localize properly in absence of glia. **(A)** DYF-11, an IFT-B particle component (19) and **(B)** CHE-11, an IFT-A particle component (20), localize normally in amphid cilia of glia-ablated animals. ODR-10, an odorant receptor (21), localizes normally when expressed in the AWC **(C)**, AWA **(D)**, or ASH **(E)** cilia of glia-ablated animals. **(F)** TAX-4, a cyclic nucleotide gated channel subunit (22), localizes normally in glia-ablated animals. Anterior is up, scale bar 10  $\mu$ m.

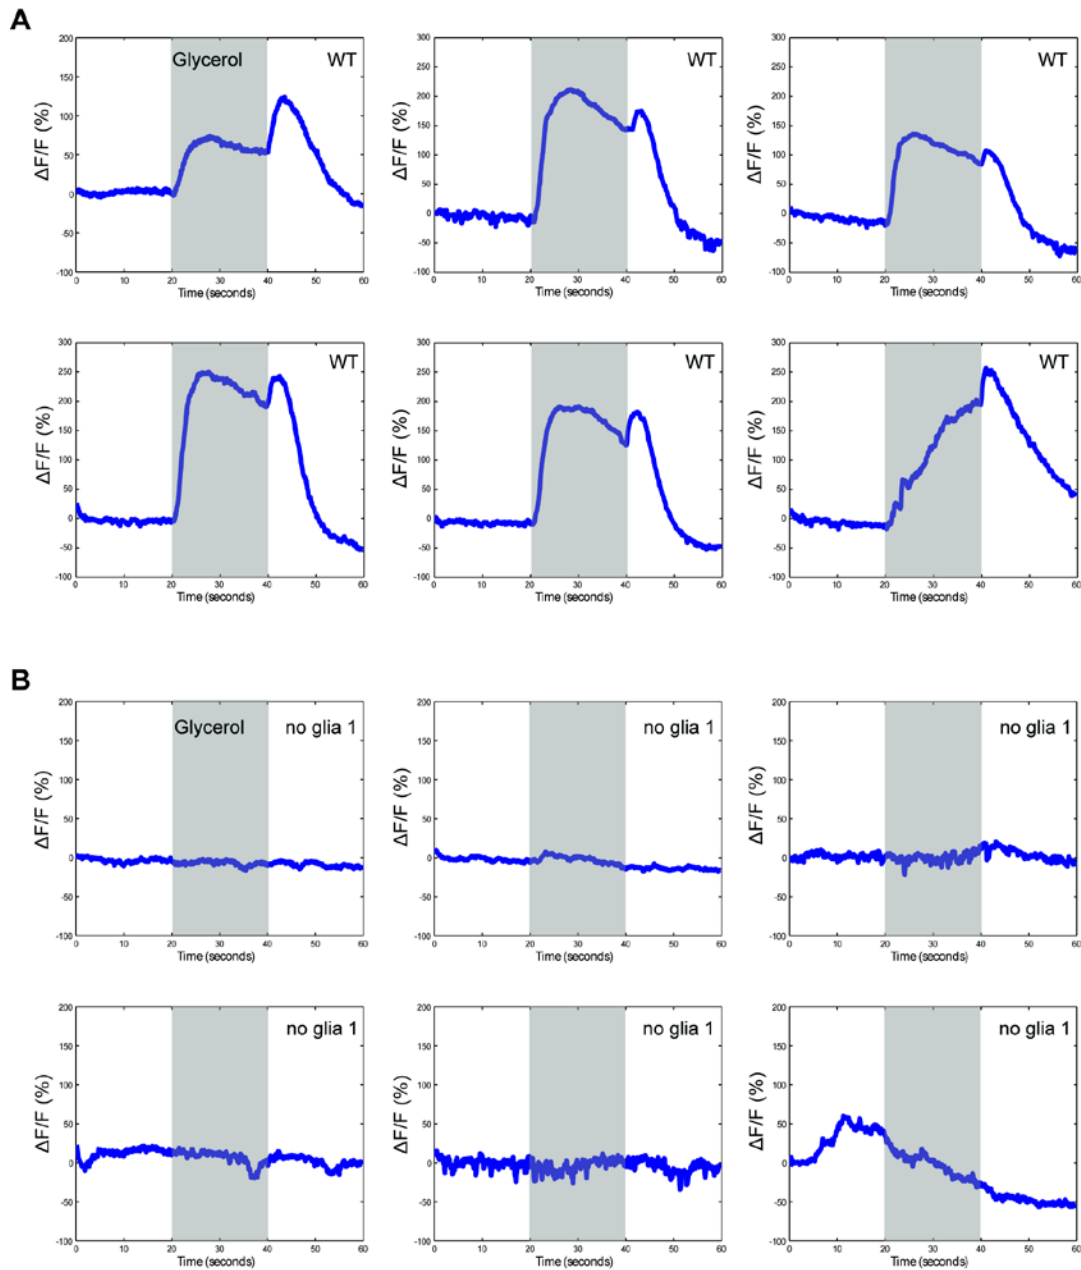

**Fig. S5.** Glia are required for  $\text{Ca}^{2+}$  changes in ASH. **(A)** Six traces of G-CaMP fluorescence in the ASH neuron of different animals exposed to 1M glycerol. Stimulus is presented during the shaded region. **(B)** In absence of glia, no G-CaMP changes are observed as a result of stimulus application.

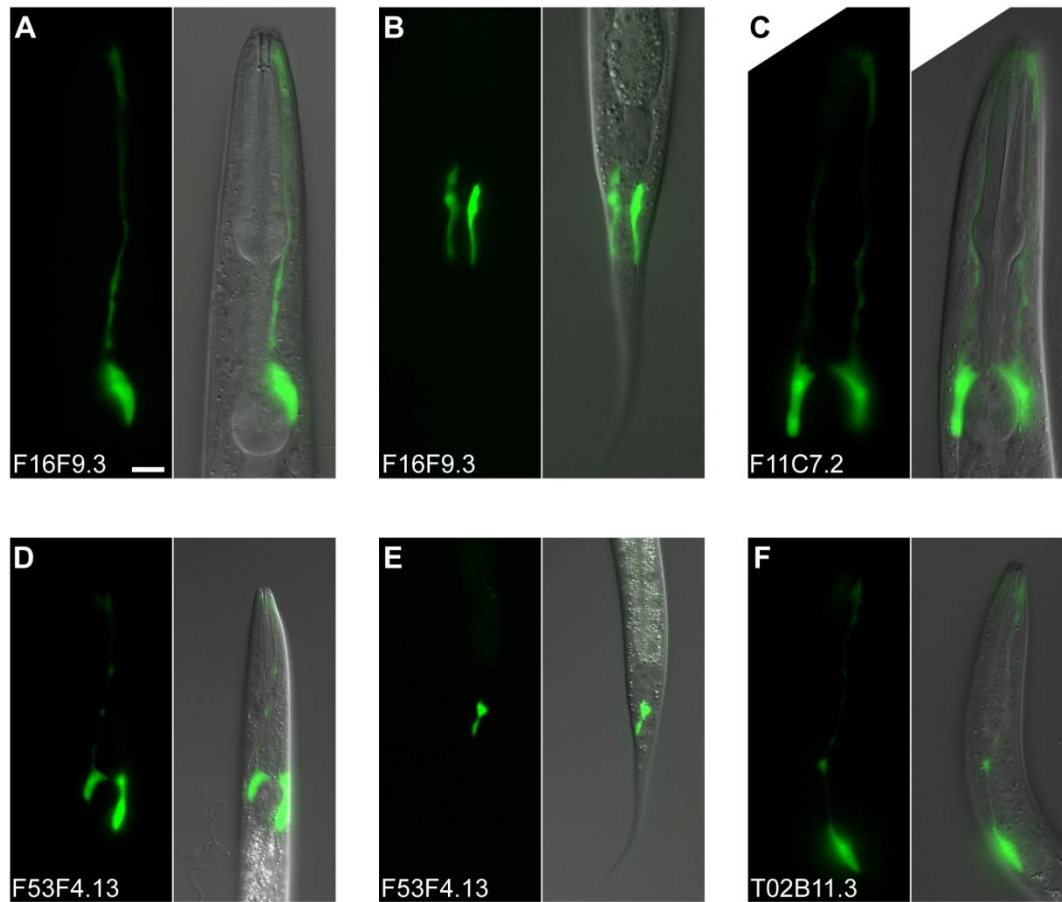

**Fig. S6.** Expression pattern of sheath-enriched genes. (**A** and **B**) F16F9.3, the most enriched gene in the microarray, is expressed only in amphid (**A**) and phasmid (**B**) sheath glia. (**C** to **F**) F11C7.2, F53F4.13 and T02B11.3 promoter fusion constructs are also expressed in amphid and phasmid sheath glia. Anterior is up, scale bar, 10  $\mu$ m.

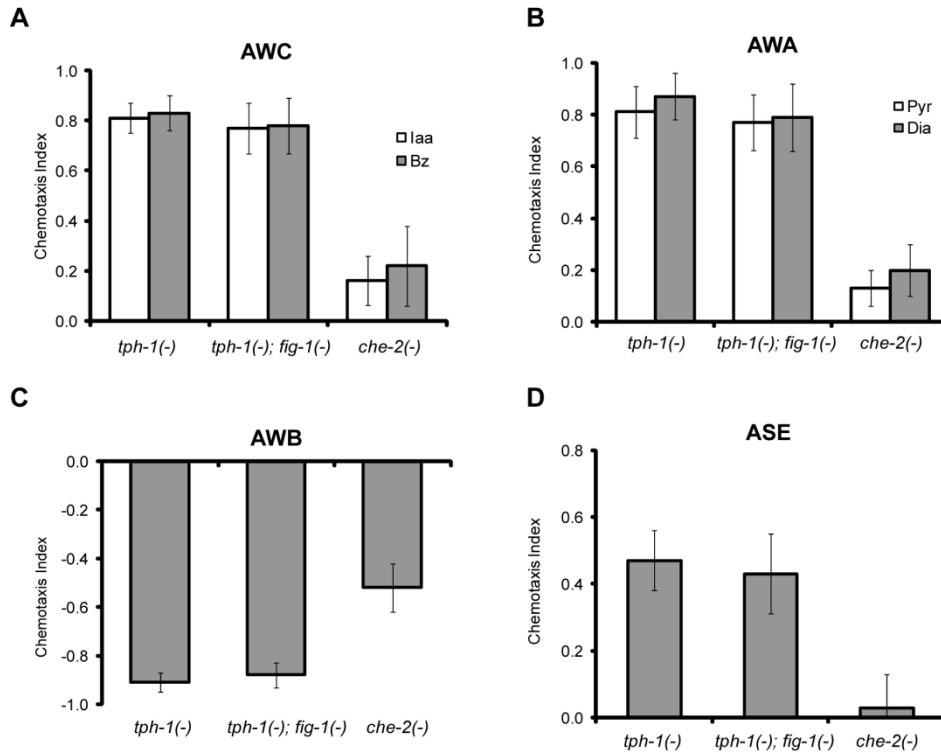

**Fig. S7.** *fig-1* mutants are normal for some odortaxis and chemotaxis behaviors. AWC (A), AWA (B), AWB (C), and ASE (D) function is not affected in *fig-1(tm2079)* animals. *fig-1(tm2079)* animals are sluggish. We found that this defect could be suppressed by *tph-1(mg280)*, a gene required for serotonin synthesis. As chemotaxis results are difficult to interpret if the animals have locomotory defects, we performed these assays in the *tph-1(mg280)* background. *che-2*, *che-2(e1033)* chemosensory mutants; error bars, standard deviation of 8 or more assays

**Table S1.** Amphid sheath glia enriched mRNAs. Genes enriched more than 4-fold are shown. The transgene used to label sheath glia, *vap-1::GFP*, expresses faintly in AFD also. The Affymetrix microarray probe used is included (Affy probe). TM, predicted transmembrane or secreted protein.

| Gene name | Locus   | Affy Probe  | Fold | Description                                                                                                                                                             | TM |
|-----------|---------|-------------|------|-------------------------------------------------------------------------------------------------------------------------------------------------------------------------|----|
| F16F9.3   |         | 181258_at   | 416  | small secreted peptide with a Calcium-binding EF-hand domain                                                                                                            | Y  |
| F14D7.7   |         | 178799_at   | 329  | similarit to Chlorobium tepidum Peptidyl-prolyl cis-trans isomerase                                                                                                     | Y  |
| T02B11.4  |         | 186124_at   | 307  | Small secreted protein with conserved cysteines                                                                                                                         | Y  |
| T02B11.3  |         | 174051_s_at | 222  | Small secreted protein with conserved cysteines                                                                                                                         | Y  |
| "         |         | 185805_at   | 38.0 |                                                                                                                                                                         |    |
| F53F4.13  |         | 182491_at   | 177  | integral membrane protein                                                                                                                                               | Y  |
| F53B7.5   |         | 173307_s_at | 163  | thrombospondin, type I and C6 repeat containg protein, secreted protein                                                                                                 | Y  |
| "         |         | 191533_s_at | 27.6 |                                                                                                                                                                         |    |
| R05A10.3  |         | 183692_s_at | 134  | contains similarity to <i>S. cerevisiae</i> <u>Conserved Oligomeric Golgi complex 1</u>                                                                                 | Y  |
| R05A10.4  |         | 183248_at   | 132  | contains similarity to Pfam domain PF07403 Protein of unknown function (DUF1505) contains similarity to Interpro domain IPR009981 (Protein of unknown function DUF1505) | Y  |
| R13D7.2   |         | 176714_at   | 101  | contains similarity to Pfam domain PF03236 Domain of unknown function DUF263 contains similarity to Interpro domain IPR004920 (Protein of unknown function DUF263)      |    |
| F15D4.7   |         | 179655_at   | 96.7 | transposon                                                                                                                                                              |    |
| F52E1.2   |         | 180478_at   | 91.1 | contains similarity to Pfam domain PF00059 Lectin C-type domain                                                                                                         | Y  |
| C33G8.4   |         | 183569_at   | 83.8 | putative secreted or extracellular protein family member precursor                                                                                                      | Y  |
| F07C6.3   |         | 177784_at   | 83.6 | transmembrane protein                                                                                                                                                   | Y  |
| R07A4.4   |         | 178781_at   | 68.7 | contains similarity to Thrombospondin, type I, IPR003609 (Apple-like), IPR003014 (N/apple PAN), IPR008266 (Tyrosine protein kinase, active site)                        | Y  |
| C08F11.1  |         | 184129_at   | 68.2 | putative secreted or extracellular protein family member precursor                                                                                                      | Y  |
| R06F6.11  | tag-209 | 187447_at   | 64.7 | putative secreted or extracellular protein precursor                                                                                                                    | Y  |
| Y54G2A.10 |         | 174184_at   | 63.2 | putative secreted or extracellular protein precursor                                                                                                                    | Y  |
| ZK822.4   |         | 178629_at   | 61.8 | contains similarity to Pfam domain PF02520 Domain of unknown function DUF148 contains similarity to Interpro domain IPR003677 (Protein of unknown function DUF148)      |    |
| F11C7.3   | vap-1   | 182409_s_at | 61.7 | vap-1 encodes a predicted secreted protein that is similar to the venom allergen-like proteins found in a number of invertebrates, including parasitic nematodes        | Y  |

Bacaj *et al.* Supporting Online Material

| Gene name  | Locus  | Affy Probe  | Fold | Description                                                                                                                                                                                                                     | TM |
|------------|--------|-------------|------|---------------------------------------------------------------------------------------------------------------------------------------------------------------------------------------------------------------------------------|----|
| "          |        | 171730_x_at | 55.8 |                                                                                                                                                                                                                                 |    |
| "          |        | 172026_x_at | 37.7 |                                                                                                                                                                                                                                 |    |
| C44H4.1    |        | 193311_at   | 58.6 | Leucine Rich Repeat (2 copies) (6 domains)                                                                                                                                                                                      | Y  |
| R05A10.2   |        | 182944_at   | 56.6 | contains similarity to <i>Saccharomyces cerevisiae</i> Actin-binding protein that stabilizes actin filaments; Tpm1,                                                                                                             | Y  |
| F35B12.9   |        | 193419_at   | 55.7 | contains similarity to <i>Homo sapiens</i> Titin; TR:Q8WZ42                                                                                                                                                                     | Y  |
| Y69H2.3    |        | 177839_s_at | 53.4 | trypsin inhibitor-like, cysteine-rich TIL region precursor family member, Fibrillins and related proteins containing Ca <sup>2+</sup> -binding EGF-like domains                                                                 | Y  |
| Y23H5B.3   |        | 176889_at   | 52.8 | putative secreted or extracellular protein precursor                                                                                                                                                                            | Y  |
| C05B5.9    |        | 189071_at   | 46.1 | pseudogene                                                                                                                                                                                                                      |    |
| Y46B2A.2   |        | 189905_s_at | 44.3 | DNA helicase PIF1/RRM3                                                                                                                                                                                                          |    |
| F11C7.2    |        | 182121_at   | 43.6 | thrombospondin, type I family member. Secreted or transmembrane                                                                                                                                                                 | Y  |
| F20A1.1    |        | 172426_x_at | 43.3 | putative secreted or extracellular protein family member precursor                                                                                                                                                              | Y  |
| F59A7.2    |        | 183014_at   | 38.7 | putative secreted or extracellular protein family member precursor                                                                                                                                                              | Y  |
| K09B3.1    |        | 181495_at   | 37.3 | metalloproteinase 1 like, Metridin-like ShK toxin;ShK domain-like                                                                                                                                                               | Y  |
| Y69A2AR.22 |        | 176280_at   | 37.2 |                                                                                                                                                                                                                                 | Y  |
| T02B11.7   | nas-32 | 188595_s_at | 36.6 | metalloprotease III family member                                                                                                                                                                                               | Y  |
| Y38H6A.3   |        | 182558_at   | 35.8 | contains similarity to Interpro domain IPR006150 (Cysteine-rich repeat)                                                                                                                                                         | Y  |
| K06A9.1    |        | 194259_x_at | 34.8 | homolog of human TCOF1, which when mutated leads to Treacher-Collins syndrome (OMIM:154500).                                                                                                                                    | Y  |
| "          |        | 184777_s_at | 12.0 |                                                                                                                                                                                                                                 |    |
| "          |        | 172070_x_at | 7.24 |                                                                                                                                                                                                                                 |    |
| F58B4.1a   | nas-31 | 189892_at   | 34.7 | Meprin A metalloprotease                                                                                                                                                                                                        | Y  |
| F14D2.7    |        | 180618_at   | 30.6 | Zinc finger, Rad18-type putative                                                                                                                                                                                                | Y  |
| K11E4.1    |        | 179237_at   | 29.8 | integral membrane protein, contains similarity to Pfam domain PF01764 (Lipase (class 3))                                                                                                                                        | Y  |
| F35E2.5    |        | 177877_at   | 28.6 | contains similarity to Pfam domain PF03761 Domain of unknown function (DUF316) contains similarity to Interpro domain IPR005514 (Protein of unknown function DUF316)                                                            | Y  |
| F40F8.4    |        | 178505_s_at | 27.5 | putative secreted or extracellular protein precursor with WD40 repeat                                                                                                                                                           | Y  |
| C25E10.11  |        | 187011_at   | 26.9 | putative secreted or extracellular protein                                                                                                                                                                                      | Y  |
| C37E2.5    | ceh-37 | 192014_s_at | 26.3 | ceh-37 has an OTX-like homeodomain but lacks other domains found in OTX proteins, and the CEH-37 homeodomain is predicted to resemble the Myb domain of telomere-binding proteins; CEH-37 binds the telomeric sequence "TTAGGC" |    |
| "          |        | 173897_at   | 5.18 |                                                                                                                                                                                                                                 |    |
| Y105C5B.5  |        | 185106_at   | 25.0 |                                                                                                                                                                                                                                 |    |



Bacaj *et al.* Supporting Online Material

| Gene name  | Locus | Affy Probe  | Fold | Description                                                                                                                                                                                                                                  | TM |
|------------|-------|-------------|------|----------------------------------------------------------------------------------------------------------------------------------------------------------------------------------------------------------------------------------------------|----|
| F59A7.5    |       | 183007_at   | 24.5 | putative secreted or transmembrane protein                                                                                                                                                                                                   | Y  |
| C56E10.3   |       | 185563_at   | 24.2 | contains similarity to Drosophila melanogaster Flybase gene name is CLIP-190-PA, FLYBASE:CG50                                                                                                                                                |    |
| "          |       | 172586_at   | 11.0 |                                                                                                                                                                                                                                              |    |
| B0285.6    |       | 190632_at   | 23.6 | predicted sodium-coupled carboxylate transporter related to Drosophila Indy and the mammalian NaDC1 and NaDC3 transporters                                                                                                                   | Y  |
| C56C10.4   |       | 184220_at   | 23.5 | contains similarity to Pfam domain PF01682 DB module contains similarity to Interpro domain IPR002602                                                                                                                                        | Y  |
| C12D8.9    |       | 179347_at   | 23.4 |                                                                                                                                                                                                                                              |    |
| C05D12.1   |       | 184125_at   | 22.3 | contains similarity to Interpro domains IPR005018 (DOMON related), IPR003006 (Immunoglobulin/major histocompatibility complex, conserved site), IPR006593 (Cytochrome b561 / ferric reductase transmembrane)                                 | Y  |
| F13B6.3    |       | 180766_at   | 21.4 | contains similarity to Homo sapiens Mucin-5AC precursor (Fragment)                                                                                                                                                                           | Y  |
| C23H3.7    | tre-5 | 187729_s_at | 20.8 | trehalase (tre-5)                                                                                                                                                                                                                            | Y  |
| F07F6.7    |       | 190471_at   | 20.5 | apolipoprotein L like                                                                                                                                                                                                                        | Y  |
| K02E11.3   |       | 181315_at   | 20.3 | contains similarity to Interpro domain IPR002213 (UDP-glucuronosyl/UDP-glucosyltransferase)                                                                                                                                                  | Y  |
| H22K11.1   | asp-3 | 191956_at   | 20.0 | asp-3 encodes an aspartyl protease homolog that is required, in parallel with ASP-4 but downstream of CLP-1 and TRA-3, for degenerative (necrotic-like) cell death in neurons induced by mutations such as mec-4(d), deg-3(d), or gsa-1(gf). | Y  |
| K02E11.5   |       | 180905_at   | 18.3 | UDP-glucuronosyl/UDP-glucosyltransferase                                                                                                                                                                                                     |    |
| C41C4.1    |       | 187005_at   | 18.3 | contains similarity to Pfam domain PF04590 Protein of unknown function, DUF595 contains similarity to Interpro domain IPR007669 (Protein of unknown function DUF595)                                                                         | Y  |
| C06E2.2    |       | 182220_at   | 16.9 |                                                                                                                                                                                                                                              |    |
| F16H6.10   |       | 176708_at   | 16.8 |                                                                                                                                                                                                                                              |    |
| Y71G12B.17 |       | 176293_at   | 16.5 | Phosphatidylinositol transfer protein [KOG3668]                                                                                                                                                                                              |    |
| Y39H10A.1  |       | 176555_at   | 14.9 | integral membrane protein                                                                                                                                                                                                                    | Y  |
| T05C1.1    |       | 182235_at   | 14.7 | putative protein, with a transmembrane domain, a coiled coil-4 domain (2E769), mRNA.                                                                                                                                                         | Y  |
| K02E11.4   |       | 181328_at   | 14.6 | contains similarity to Interpro domain IPR007110 (Immunoglobulin-like)                                                                                                                                                                       | Y  |
| Y73B6A.3   |       | 185418_at   | 14.6 | putative secreted or extracellular protein family member precursor, UDP-glucuronosyl/UDP-glucosyltransferase;Histone H5                                                                                                                      | Y  |
| F36H2.3    |       | 192520_s_at | 14.5 | Complement factor H precursor like                                                                                                                                                                                                           | Y  |
| T23C6.3    |       | 183310_s_at | 13.5 |                                                                                                                                                                                                                                              |    |
| M01G12.14  |       | 185163_s_at | 13.4 | contains similarity to Rhizobium meliloti Putative transposase of insertion sequence ISRM19 protein                                                                                                                                          |    |
| E02H9.3    |       | 181022_s_at | 13.0 | contains similarity to Pfam domain PF03312 Protein of unknown function, DUF272 contains similarity to Interpro domain IPR004987                                                                                                              |    |

Bacaj *et al.* Supporting Online Material

| Gene name  | Locus   | Affy Probe  | Fold | Description                                                                                                                                                                                                                                  | TM |
|------------|---------|-------------|------|----------------------------------------------------------------------------------------------------------------------------------------------------------------------------------------------------------------------------------------------|----|
| C40H5.2    |         | 178802_at   | 12.4 | contains similarity to Bifidobacterium longum Possible magnesium and cobalt transport protein.; TR:Q8G4E0                                                                                                                                    |    |
| F49F1.7    |         | 181132_s_at | 12.3 | contains similarity to Pfam domain PF01549 ShK domain-like contains similarity to Interpro domain IPR003582 (Metridin-like ShK toxin)                                                                                                        | Y  |
| H11L12.1   |         | 172299_x_at | 12.1 |                                                                                                                                                                                                                                              |    |
| "          |         | 172550_x_at | 10.1 |                                                                                                                                                                                                                                              |    |
| C16H3.2    | lec-9   | 192336_at   | 12.0 | lec-9 encodes a predicted lectin that affects embryonic viability.                                                                                                                                                                           |    |
| F59E11.2   |         | 185750_at   | 12.0 | Short-chain dehydrogenase/reductase SDR;Glucose/ribitol dehydrogenase;Insect alcohol dehydrogenase family;NAD(P)-binding;short chain dehydrogenase                                                                                           |    |
| C12C8.1    | hsp-70  | 192266_s_at | 11.8 | hsp-70 encodes a heat-shock protein that is a member of the hsp70 family of molecular chaperones.                                                                                                                                            |    |
| F31F6.5    | daf-6   | 187906_at   | 11.6 | a Patched-like gene required for amphid sheath channel formation, daf-6 interacts genetically with che-14                                                                                                                                    | Y  |
| C27C7.1    |         | 172213_x_at | 11.5 | contains similarity to Homo sapiens Hypothetical protein FLJ13213                                                                                                                                                                            |    |
| C17E7.6    | nhr-158 | 190925_at   | 11.5 | nuclear receptor NHR-51 like family member                                                                                                                                                                                                   |    |
| F08G5.6    |         | 178843_at   | 11.3 | CUB-like region; CUB-like domain                                                                                                                                                                                                             | Y  |
| T19H12.3   |         | 185822_s_at | 11.3 | putative secreted or extracellular protein family member precursor UDP-glucuronosyl/UDP-glucosyltransferase                                                                                                                                  | Y  |
| M03E7.2    |         | 181683_at   | 11.1 | contains similarity to Plasmodium berghei 58 kDa phosphoprotein (Heat shock-related protein) (HRP).; SW:Q08168                                                                                                                               | Y  |
| Y54F10BM.3 |         | 173344_at   | 10.8 | Protein-tyrosine phosphatase, receptor/non-receptor type;Protein-tyrosine phosphatase;Protein-tyrosine phosphatase, catalytic                                                                                                                | Y  |
| C38D9.2    |         | 179425_at   | 10.6 | Zinc finger, CCHC-type                                                                                                                                                                                                                       |    |
| F59D6.7    |         | 180406_at   | 10.4 | contains similarity to Pfam domain PF00036 EF hand contains similarity to Interpro domains IPR011992 (EF-Hand type), IPR002048 (Calcium-binding EF-hand), IPR008080 (Parvalbumin), IPR003299 (Flagellar calcium-binding protein (calflagin)) |    |
| F59D12.3   |         | 180289_at   | 10.4 | contains similarity to Pfam domain PF04590 Protein of unknown function, DUF595 contains similarity to Interpro domain IPR007669 (Protein of unknown function DUF595)                                                                         | Y  |
| T13B5.9    |         | 175491_at   | 10.3 | Peptidase M, neutral zinc metallopeptidases, zinc-binding site                                                                                                                                                                               |    |
| C25F9.2    |         | 178896_at   | 9.9  | DNA polymerase type B, organellar and viral family member (5T899), predicted mRNA.                                                                                                                                                           |    |

Bacaj *et al.* Supporting Online Material

| Gene name | Locus    | Affy Probe  | Fold | Description                                                                                                                                                                                                        | TM |
|-----------|----------|-------------|------|--------------------------------------------------------------------------------------------------------------------------------------------------------------------------------------------------------------------|----|
| F10A3.1   |          | 177627_at   | 9.8  | claudin homolog that may be required for normal cohesion of apical junctions in epithelia; F10A3.1 is worm-specific, with obvious homologs only in <i>C. elegans</i>                                               | Y  |
| K02A2.3   | kcc-3    | 193537_s_at | 9.7  | Bumetanide-sensitive Na-K-C1 cotransporter                                                                                                                                                                         | Y  |
| C25A1.2   | fkh-10   | 190179_at   | 9.7  | fkh-10 encodes one of 15 forkhead transcription factors                                                                                                                                                            |    |
| W01A11.4  | lec-10   | 190281_at   | 9.6  | lec-10 encodes a galectin, a soluble galactose-binding lectin; recombinant lec-10 can bind to sugar in an in vitro assay.                                                                                          |    |
| W06D11.3  |          | 183074_at   | 9.6  | Homologous to <i>E. coli</i> RecQ and human BLM and WRN proteins that are defective in Bloom's syndrome and Werner's syndrome                                                                                      |    |
| C11H1.9   |          | 177796_at   | 9.4  | contains similarity to Pfam domain PF01105 emp24/gp25L/p24 family/GOLD contains similarity to Interpro domains IPR001251 (Cellular retinaldehyde-binding/triple function, C-terminal), IPR000348 (emp24/gp25L/p24) | Y  |
| C14F11.5  | hsp-43   | 190097_s_at | 9.4  | heat shock protein                                                                                                                                                                                                 |    |
| Y38H6C.7  |          | 181511_at   | 9.3  | pseudogene                                                                                                                                                                                                         |    |
| F21H12.4  | ptc-2    | 193368_s_at | 9.3  | PATCHED homolog, has sterol sensing domain (SSD); PTC-2 is required for normal fat storage, normal egg osmotic integrity, locomotion, egg laying, and viability in RNAi assays                                     | Y  |
| K12H4.1   | ceh-26   | 176620_at   | 9.3  | ceh-26 encodes a protein that contains a prospero-related homeodomain; expressed in nuclei of the adult head, tail neurons, and one cell in the postdeirids.                                                       |    |
| K10C2.3   |          | 189595_s_at | 9.3  | aspartic proteinase family member                                                                                                                                                                                  | Y  |
| C14F11.6  |          | 193712_s_at | 9.1  | DTDP-4-dehydrorhamnose 3,5-epimerase (RFBC gene)                                                                                                                                                                   |    |
| T04A11.1  |          | 182091_s_at | 9.1  | Phenazine biosynthesis PhzC/PhzF protein;Phenazine biosynthesis-like protein                                                                                                                                       |    |
| Y55B1BL.1 |          | 186903_at   | 9.1  | integral membrane protein                                                                                                                                                                                          | Y  |
| F53F4.6   | rdy-2    | 178699_at   | 9.1  | RDY-2 (rod-like lethal Dye-filling defective); contains similarity to Interpro domain IPR017441 (Protein kinase ATP binding, conserved site)                                                                       | Y  |
| C05B5.3   | pqn-8    | 186853_s_at | 8.9  | glutamine/asparagine (Q/N)-rich ('prion') domain                                                                                                                                                                   | Y  |
| C38D9.5   |          | 178878_at   | 8.9  | BRCT;Ankyrin;Protein of unknown function WSN;Domain of unknown function                                                                                                                                            | Y  |
| C56C10.6  |          | 189105_s_at | 8.8  | Casein kinase                                                                                                                                                                                                      |    |
| C33C12.3  |          | 189972_at   | 8.5  | contains similarity to Pfam domain PF02055 O-Glycosyl hydrolase family 30 contains similarity to Interpro domains IPR017853 (Glycoside hydrolase, catalytic core)                                                  | Y  |
| Y46C8AL.2 | clec-174 | 172185_x_at | 8.4  | C-type lectin                                                                                                                                                                                                      | Y  |
| R05D7.5   |          | 178659_at   | 8.3  | putative membrane protein                                                                                                                                                                                          | Y  |
| Y57E12B.3 |          | 176402_at   | 8.2  | contains similarity to Pfam domains PF04083 (ab-hydrolase associated lipase region), IPR000073 (Alpha/beta hydrolase fold-1), IPR000694 (Proline-rich region)                                                      | Y  |

Bacaj *et al.* Supporting Online Material

| Gene name  | Locus    | Affy Probe  | Fold | Description                                                                                                                                                                                                                                                       | TM |
|------------|----------|-------------|------|-------------------------------------------------------------------------------------------------------------------------------------------------------------------------------------------------------------------------------------------------------------------|----|
| Y6E2A.4    |          | 179418_at   | 8.1  | contains similarity to Pfam domains PF00104 (Ligand-binding domain of nuclear hormone receptor) , PF00105 (Zinc finger, C4 type (two domains))                                                                                                                    |    |
| Y65B4BL.2  | deps-1   | 186952_at   | 8.0  | unfamiliar P-granule-associated protein required for germline RNAi, orthologs in other Caenorhabditis species, but has no non-nematode orthologs.                                                                                                                 |    |
| Y110A2AL.4 |          | 187531_at   | 8.0  | putative membrane protein                                                                                                                                                                                                                                         | Y  |
| "          |          | 175367_s_at | 6.7  |                                                                                                                                                                                                                                                                   |    |
| F32B5.4    |          | 183820_at   | 8.0  | putative membrane protein                                                                                                                                                                                                                                         | Y  |
| F29B9.9    | col-111  | 188461_s_at | 7.9  | COLLagen structural gene                                                                                                                                                                                                                                          | Y  |
| Y69H2.1    |          | 177981_at   | 7.9  | contains similarity to Myxine glutinosa NADH-ubiquinone oxidoreductase chain 4                                                                                                                                                                                    | Y  |
| C05B5.8    |          | 186950_at   | 7.8  | contains similarity to Shigella flexneri Putative transport protein.; TR:Q83RB7                                                                                                                                                                                   | Y  |
| F14D2.4    | bath-29  | 181360_s_at | 7.8  | Meprin/TRAF-like MATH and BTB/POZ domain containing protein family member                                                                                                                                                                                         |    |
| "          |          | 181302_s_at | 6.1  |                                                                                                                                                                                                                                                                   |    |
| T13C2.2    |          | 179776_at   | 7.6  |                                                                                                                                                                                                                                                                   | Y  |
| "          |          | 180200_at   | 5.6  |                                                                                                                                                                                                                                                                   |    |
| C17C3.5    |          | 183228_at   | 7.6  | Protein of unknown function DUF38, Caenorhabditis species;FTH domain                                                                                                                                                                                              |    |
| R09H3.3    |          | 179945_at   | 7.5  |                                                                                                                                                                                                                                                                   |    |
| W09B6.5    |          | 181510_at   | 7.4  |                                                                                                                                                                                                                                                                   |    |
| ZC449.2    |          | 183234_s_at | 7.4  | PAN domain and Apple-like domain, secreted or transmembrane                                                                                                                                                                                                       | Y  |
| "          |          | 191797_at   | 6.1  |                                                                                                                                                                                                                                                                   |    |
| C12D5.7    | cyp-33A1 | 189430_at   | 7.4  | cytochrome p450 2C33v4 family member (5I160)                                                                                                                                                                                                                      | Y  |
| C17E7.9    |          | 175231_s_at | 7.3  | integral membrane protein                                                                                                                                                                                                                                         | Y  |
| C04F12.9   | rnh-1.3  | 184160_at   | 7.3  | ribonuclease H                                                                                                                                                                                                                                                    |    |
| Y105C5A.25 |          | 187110_at   | 7.3  | pseudogene                                                                                                                                                                                                                                                        |    |
| F59H6.5    |          | 185671_s_at | 7.3  | contains similarity to Pfam domain PF05970 Eukaryotic protein of unknown function (DUF889) contains similarity to Interpro domains IPR010285 (Protein of unknown function DUF889, eukaryote), IPR003593 (AAA+ ATPase, core), IPR006034 (Asparaginase/glutaminase) |    |
| C34D4.10   |          | 181223_at   | 7.2  |                                                                                                                                                                                                                                                                   | Y  |
| C49A9.4    |          | 182898_at   | 7.1  | orthologous to the human gene CYSTATIN B (STEFIN B) (CSTB; OMIM:601145), which when mutated leads to disease.                                                                                                                                                     |    |
| C10H11.10  | kca-1    | 186482_s_at | 7.1  |                                                                                                                                                                                                                                                                   |    |
| T04G9.7    |          | 179805_s_at | 7.1  |                                                                                                                                                                                                                                                                   | Y  |
| "          |          | 174857_at   | 6.0  |                                                                                                                                                                                                                                                                   |    |
| C28H8.11   |          | 192112_s_at | 7.0  | Tryptophan 2,3-dioxygenase                                                                                                                                                                                                                                        |    |
| Y38H6C.8   |          | 193307_at   | 7.0  | Lectin C-type domain short and long forms                                                                                                                                                                                                                         | Y  |
| T14G8.4    |          | 179625_at   | 7.0  | contains similarity to Mus musculus Gamma-tubulin complex component GCP5 homolog.; TR:Q8BKN5                                                                                                                                                                      | Y  |
| F59B1.2    |          | 182919_at   | 7.0  |                                                                                                                                                                                                                                                                   | Y  |

Bacaj *et al.* Supporting Online Material

| <b>Gene name</b> | <b>Locus</b> | <b>Affy Probe</b> | <b>Fold</b> | <b>Description</b>                                                                                                                                                                                           | <b>TM</b> |
|------------------|--------------|-------------------|-------------|--------------------------------------------------------------------------------------------------------------------------------------------------------------------------------------------------------------|-----------|
| F58B6.2          | inf1-1       | 183953_at         | 7.0         | Proline-rich region;Actin-binding FH2 and DRF autoregulatory;Actin-binding FH2;Formin Homology 2 Domain                                                                                                      |           |
| Y65B4BR.8        |              | 175375_at         | 6.8         | contains similarity to Pfam domain PF06425 Partner of SLD five, PSF3 contains similarity to Interpro domain IPR010492 (GINS complex, Psf3 component)                                                         |           |
| Y38E10A.12       |              | 172624_x_at       | 6.8         | contains similarity to Pfam domain PF07203 Protein of unknown function (DUF1412) contains similarity to Interpro domain IPR009853 (Protein of unknown function DUF1412)                                      | Y         |
| Y43F8C.1         | nlp-25       | 183895_at         | 6.8         | Neuropeptide-Like Protein (prion protein)                                                                                                                                                                    | Y         |
| F40G12.5         |              | 180606_at         | 6.7         | Protein of unknown function DUF263;Domain of unknown function DUF263                                                                                                                                         | Y         |
| T05F1.7          |              | 178341_at         | 6.7         | contains similarity to Paramecium tetraurelia Chromosome undetermined scaffold_33, whole genome shotgun sequence.; TR:A0D056                                                                                 |           |
| F20A1.10         |              | 186043_at         | 6.7         | putative secreted protein                                                                                                                                                                                    | Y         |
| F53A9.8          |              | 180612_s_at       | 6.7         | contains similarity to Plasmodium chabaudi Pfam-3 protein putative (Fragment).; TR:Q4XGP3                                                                                                                    |           |
| Y39E4B.12        | gly-5        | 187815_s_at       | 6.7         | gly-5 encodes a predicted member of the UDP-GalNAc:polypeptide N-acetylgalactosaminyltransferase (ppGaNTase) family.                                                                                         | Y         |
| T27F2.4          |              | 179204_s_at       | 6.7         | Basic-leucine zipper (bZIP) transcription factor                                                                                                                                                             |           |
| Y57G7A.5         |              | 184542_at         | 6.7         |                                                                                                                                                                                                              |           |
| F20A1.9          |              | 183123_s_at       | 6.6         | B302, (SPRY)-like;SP1a/Ryanodine receptor SPRY;ATPase associated with various cellular activities, AAA-4;SPRY domain;Divergent AAA domain                                                                    |           |
| T16G1.5          |              | 179610_s_at       | 6.5         | Protein of unknown function DUF227;Protein kinase-like;Protein of unknown function DUF1679, Caenorhabditis species;CHK kinase-like;Protein of unknown function (DUF1679);Domain of unknown function (DUF227) |           |
| T06C12.4         | fbxa-197     | 182533_at         | 6.5         | Protein of unknown function DUF38, Caenorhabditis species;FTH domain                                                                                                                                         |           |
| C17H12.12        |              | 186931_at         | 6.5         | BTB/POZ-like                                                                                                                                                                                                 |           |
| ZK265.2          | col-63       | 173650_s_at       | 6.5         | COLLAGEN structural gene (37.4 kD) (col-63)                                                                                                                                                                  | Y         |
| T05E11.8         |              | 179794_at         | 6.5         | contains similarity to Pfam domain PF02520 Domain of unknown function DUF148 contains similarity to Interpro domain IPR003677 (Protein of unknown function DUF148)                                           | Y         |
| C04B4.2          |              | 179273_at         | 6.3         | Calcium-binding EF-hand                                                                                                                                                                                      |           |
| H06H21.1         | srw-94       | 184731_at         | 6.3         | 7TM chemoreceptor, srw family                                                                                                                                                                                | Y         |
| B0280.12b        | glr-2        | 189724_at         | 6.3         | glr-2 encodes an AMPA (non-NMDA)-type ionotropic glutamate receptor subunit                                                                                                                                  | Y         |
| Y37D8A.23        | unc-25       | 194006_at         | 6.3         | GABA neurotransmitter biosynthetic enzyme, glutamic acid decarboxylase (GAD); unc-25 activity is required for GABA synthesis                                                                                 |           |
| Y43F8B.9         |              | 180823_at         | 6.3         |                                                                                                                                                                                                              |           |

Bacaj *et al.* Supporting Online Material

| Gene name | Locus    | Affy Probe  | Fold | Description                                                                                                                                                                                        | TM |
|-----------|----------|-------------|------|----------------------------------------------------------------------------------------------------------------------------------------------------------------------------------------------------|----|
| T21G5.3   | glh-1    | 190711_at   | 6.2  | a putative DEAD-box RNA helicase that contains four CCHC zinc fingers and is homologous to <i>Drosophila</i> VASA, a germ-line-specific, ATP-dependent RNA helicase                                |    |
| F26A1.9   |          | 184151_at   | 6.2  |                                                                                                                                                                                                    |    |
| Y39A3B.3  |          | 184691_at   | 6.2  | integral membrane protein                                                                                                                                                                          | Y  |
| C05D2.8   |          | 187761_s_at | 6.2  |                                                                                                                                                                                                    | Y  |
| B0034.4   |          | 187363_at   | 6.1  |                                                                                                                                                                                                    | Y  |
| Y8G1A.2   | inx-13   | 193448_s_at | 6.0  | inx-13 encodes an innexin, an integral transmembrane channel protein that is a structural component of invertebrate gap junctions                                                                  | Y  |
| F10C1.2   | ifb-1    | 192149_s_at | 6.0  | ifb-1 (also known as vab-21) encodes two isoforms of an essential intermediate filament protein that is coexpressed with the essential IF proteins IFA-1, IFA-2, and IFA-3, along with IFA-4       |    |
| "         |          | 175020_at   | 5.2  |                                                                                                                                                                                                    |    |
| F14B4.1   |          | 174848_s_at | 6.0  | LDL receptor-related protein                                                                                                                                                                       | Y  |
| H02I12.1  |          | 180976_s_at | 5.9  | protein with 12 chitin-binding peritrophin-A domains; H02I12.1(RNAi) animals have an osmotically-sensitive embryonic lethal phenotype, perhaps because of defects in chitin and eggshell synthesis | Y  |
| F53B2.3   | eak-4    | 178868_at   | 5.9  | eak-4 encodes a novel protein that contains an N-myristoylation signal; eak-4 acts in parallel to akt-1 to regulate insulin-like signaling and dauer formation                                     | Y  |
| C14F5.2   | zig-3    | 192500_at   | 5.8  | zig-3 encodes a predicted secreted protein that is a member of the immunoglobulin superfamily of proteins;                                                                                         | Y  |
| Y97E10B.6 | srx-11   | 187148_at   | 5.8  | pseudogene                                                                                                                                                                                         |    |
| F56C11.2  | ptr-11   | 171745_x_at | 5.7  | ptr-11 encodes a nematode-specific member of the sterol sensing domain (SSD) proteins, distantly paralogous to <i>Drosophila</i> PATCHED (PTC) and human PTCH (OMIM:601309)                        | Y  |
| M01G12.9  |          | 179942_at   | 5.7  |                                                                                                                                                                                                    |    |
| F33D4.2   | itr-1    | 193676_s_at | 5.7  | inositol (1,4,5) trisphosphate receptor that affects the defecation cycle and pharyngeal pumping, and also affects ovulation in a pathway downstream of LET-23; interacts with UNC-54 in vivo      | Y  |
| H38K22.5  | gly-6    | 175655_s_at | 5.7  | Glycosyl transferases                                                                                                                                                                              | Y  |
| R09H3.2   |          | 172250_x_at | 5.7  | probe is in intergenic region                                                                                                                                                                      |    |
| F31C3.10  | rrn-3.56 | 173281_s_at | 5.6  | ribosomal RNA                                                                                                                                                                                      |    |
| F47C12.8  |          | 186276_at   | 5.6  | contains similarity to Pfam domain PF05912 C. elegans protein of unknown function (DUF870) contains similarity to Interpro domain IPR008588 (Protein of unknown function DUF870)                   | Y  |
| "         |          | 171767_x_at | 4.8  |                                                                                                                                                                                                    |    |
| F20B6.8   | hpk-1    | 180322_at   | 5.6  | a predicted dual-specificity protein kinase with distant homology to the vertebrate protein kinase DYRK1A and the <i>Drosophila</i> homolog mini-brain                                             |    |

Bacaj *et al.* Supporting Online Material

| <b>Gene name</b> | <b>Locus</b> | <b>Affy Probe</b> | <b>Fold</b> | <b>Description</b>                                                                                                                                                                                                                            | <b>TM</b> |
|------------------|--------------|-------------------|-------------|-----------------------------------------------------------------------------------------------------------------------------------------------------------------------------------------------------------------------------------------------|-----------|
| ZK1037.5         | nhr-247      | 194098_at         | 5.6         | Ligand-binding domain of nuclear hormone receptors, Zinc finger, C4 type (two domains)                                                                                                                                                        |           |
| F57A8.1          |              | 188628_at         | 5.5         | ETS domain                                                                                                                                                                                                                                    |           |
| Y92C3B.1         | kbp-4        | 177029_at         | 5.5         | Tropomyosin                                                                                                                                                                                                                                   |           |
| Y67A10A.9        |              | 185683_at         | 5.5         | claudin homolog, protein with at least 3 transmembrane domains                                                                                                                                                                                | Y         |
| "                |              | 173027_s_at       | 4.3         |                                                                                                                                                                                                                                               |           |
| F59H5.3          | bath-12      | 183672_at         | 5.5         | pseduogene (Meprin/TRAF-like MATH and BTB/POZ domain containing protein family member)                                                                                                                                                        |           |
| T08G5.3          |              | 179131_at         | 5.5         | contains similarity to Homo sapiens hypothetical protein                                                                                                                                                                                      | Y         |
| R166.5           | mnk-1        | 190356_at         | 5.5         | serine/threonine kinase                                                                                                                                                                                                                       |           |
| F21H7.2          |              | 173177_s_at       | 5.4         | contains similarity to Homo sapiens Neurofilament heavy polypeptide                                                                                                                                                                           |           |
| "                |              | 178141_s_at       | 4.0         |                                                                                                                                                                                                                                               |           |
| ZK669.5          |              | 189359_s_at       | 5.4         | ras oncogene family                                                                                                                                                                                                                           |           |
| C39B5.2          |              | 182485_at         | 5.4         | Cyclin-like F-box;F-box domain                                                                                                                                                                                                                |           |
| Y38E10A.15       |              | 172635_x_at       | 5.4         | Protein of unknown function DUF1412; Protein of unknown function (DUF1412)                                                                                                                                                                    | Y         |
| C05D10.4         |              | 176149_at         | 5.4         | sterile alpha motif SAM                                                                                                                                                                                                                       |           |
| "                |              | 187862_at         | 5.2         |                                                                                                                                                                                                                                               |           |
| F35E12.6         |              | 180342_at         | 5.3         | CUB; CUB-like region; CUB-like domain                                                                                                                                                                                                         | Y         |
| Y46H3A.2         | hsp-16.41    | 188444_at         | 5.3         | hsp-16.41 encodes a 16-kD heat shock protein (HSP) that is a member of the hsp16/hsp20/alphaB-crystallin (HSP16) family of heat shock proteins                                                                                                |           |
| ZK20.2           | kin-6        | 175005_at         | 5.3         | kin-6 encodes a predicted tyrosine protein kinase.                                                                                                                                                                                            | Y         |
| ZK488.2          | nhr-90       | 189961_at         | 5.3         | nuclear Hormone Receptor                                                                                                                                                                                                                      |           |
| Y59E1B.1         |              | 185607_at         | 5.3         | putative nuclear protein (XC497)                                                                                                                                                                                                              |           |
| C14C10.7         | ttr-43       | 191018_at         | 5.3         | ttr-43 - (TransThyretin-Related family domain) contains similarity to Interpro domain IPR001534 (Transthyretin-like)                                                                                                                          | Y         |
| F53G12.3         |              | 184226_at         | 5.3         | partial homolog of dual oxidase ('Ce-Duox2'), with an N-terminal peroxidase domain, two central calmodulin-binding EF hands, and a C-terminal superoxide-generating NADPH-oxidase domain                                                      | Y         |
| C01B10.3         |              | 185295_s_at       | 5.3         | a paralog of IPP-5, and thus may functionally overlap with ipp-5 in vivo.                                                                                                                                                                     |           |
| W03A5.4          |              | 183687_at         | 5.2         | contains similarity to Homo sapiens Uncharacterized protein DLGAP1                                                                                                                                                                            |           |
| F49C5.8          |              | 172759_x_at       | 5.2         | transposon                                                                                                                                                                                                                                    |           |
| Y75B12B.3        |              | 185413_at         | 5.2         | contains similarity to Saccharomyces cerevisiae Mlp proteins restrict telomere length by influencing the Rif1-Tel1 pathway of telomerase regulation; also involved in the translocation of macromolecules between the nucleoplasm and the NPC |           |
| F17C8.5          | twk-6        | 187930_at         | 5.2         | twk-6 encodes one of 44 C. elegans TWK (two-P domain K+) potassium channel subunits that contain two pore-forming domains and four transmembrane domains                                                                                      | Y         |

Bacaj *et al.* Supporting Online Material

| Gene name  | Locus    | Affy Probe  | Fold | Description                                                                                                                                                                         | TM |
|------------|----------|-------------|------|-------------------------------------------------------------------------------------------------------------------------------------------------------------------------------------|----|
| R02C2.4    | nhr-204  | 191007_at   | 5.2  | nuclear hormone receptor                                                                                                                                                            | Y  |
| W04G5.2    | rab-11.2 | 189771_at   | 5.2  | RAB family member (rab-11.2)                                                                                                                                                        | Y  |
| K08E5.3    | mua-3    | 189800_s_at | 5.1  | Caenorhabditis elegans essential gene mua-3, transmembrane cell adhesion receptor precursor; matrix receptor, muscle attachment protein, MUScle Attachment abnormal                 | Y  |
| R07B1.10   | lec-8    | 175710_s_at | 5.1  | galectin (20.4 kD) (lec-8)                                                                                                                                                          |    |
| F40F9.3    |          | 193047_at   | 5.1  | contains similarity to Interpro domain IPR001478 (PDZ/DHR/GLGF)                                                                                                                     |    |
| T21E8.3    | pgp-8    | 189037_at   | 5.1  | pgp-8 encodes an ATP-binding protein that is a member of the P-glycoprotein subclass of the ATP-binding cassette (ABC) transporter superfamily; transmembrane                       | Y  |
| ZK355.5    |          | 183073_at   | 5.0  | EGF receptor, L domain;Receptor L domain                                                                                                                                            | Y  |
| F25H5.8    |          | 178186_at   | 5.0  | Protein of unknown function<br>UPF0057;Uncharacterized protein family UPF0057                                                                                                       | Y  |
| Y71H2AM.22 | twk-45   | 176220_at   | 5.0  | twk-45 - (TWiK family of potassium channels)                                                                                                                                        | Y  |
| K04H4.2    |          | 174044_at   | 5.0  | secreted, with an N-terminal chitin-binding peritrophin-A domain followed by up to 15 cysteine-rich domains; the general organization of K04H4.2 protein resembles that of T10E10.4 | Y  |
| C36C9.3    | fbxa-170 | 180118_at   | 5.0  | a protein containing an F-box and an FTH/DUF38 motif, which may also mediate protein-protein interaction.                                                                           |    |
| R10H10.4   |          | 183646_at   | 5.0  | contains similarity to Arabidopsis thaliana T15B16.1 protein.; TR:Q9ZSH8                                                                                                            | Y  |
| Y57G11C.31 |          | 187086_at   | 5.0  | Protein of unknown function DUF271; Protein of unknown function (DUF271)                                                                                                            | Y  |
| T24B8.6    | hlh-3    | 192523_at   | 4.9  | hlh-3 encodes a basic helix-loop-helix transcription factor homologous to Drosophila Achaete-scute                                                                                  |    |
| Y46H3A.1   | srt-42   | 184414_at   | 4.9  | 7TM chemoreceptor, srt family                                                                                                                                                       | Y  |
| W02D7.3    |          | 180864_at   | 4.9  |                                                                                                                                                                                     | Y  |
| R03H10.6   |          | 186074_at   | 4.8  | Nucleic acid binding, OB-fold, tRNA/helicase-type;Nucleic acid-binding, OB-fold;Nucleic acid-binding, OB-fold-like;OB-fold nucleic acid binding domain                              |    |
| T10D4.10   | sri-43   | 191471_at   | 4.8  | 7TM chemoreceptor, sri family                                                                                                                                                       | Y  |
| ZK470.1    |          | 183484_at   | 4.8  | contains similarity to Interpro domain IPR007248 (Mpv17/PMP22)                                                                                                                      | Y  |
| K05B2.3    | ifa-4    | 193214_s_at | 4.8  | nonessential intermediate filament protein that is coexpressed with the essential IF protein IFB-1                                                                                  |    |
| T28F4.6    |          | 178783_at   | 4.8  | contains similarity to Interpro domain IPR016024 (Armadillo-type fold)                                                                                                              |    |
| T25F10.3   |          | 186385_at   | 4.8  | EGF-like, type 3;Delta/Serrate/lag-2 (DSL) protein;EGF-like, laminin;EGF;EGF-like region, conserved site                                                                            | Y  |
| ZK770.3    | inx-12   | 180366_s_at | 4.8  | inx-12 (innexin=invertebrate connexin analogue) encodes a protein of the innexin family; innexins are the only known gap junction proteins in invertebrates                         | Y  |



Bacaj *et al.* Supporting Online Material

| Gene name  | Locus    | Affy Probe  | Fold | Description                                                                                                                                                                                                                                                       | TM |
|------------|----------|-------------|------|-------------------------------------------------------------------------------------------------------------------------------------------------------------------------------------------------------------------------------------------------------------------|----|
| Y66D12A.17 | such-1   | 174877_at   | 4.8  | such-1 encodes a component of the anaphase promoting complex/cyclosome (APC/C)                                                                                                                                                                                    |    |
| W03D8.6    | itx-1    | 188000_at   | 4.8  | itx-1 encodes one of two Caspr orthologues found in the <i>C. elegans</i> genome; Caspr proteins belong to the Neurexin superfamily which mediate cell-cell contacts and in the formation of specialized membrane-domains in polarized epithelial and nerve cells | Y  |
| F55D1.2    |          | 183246_at   | 4.7  |                                                                                                                                                                                                                                                                   |    |
| B0281.4    |          | 181853_at   | 4.7  | Potassium channel, voltage dependent, Kv, tetramerisation;BTB/POZ fold;K+ channel tetramerisation domain                                                                                                                                                          | Y  |
| W10D5.3    | gei-17   | 188222_s_at | 4.7  | gei-17 encodes a protein containing a MIZ domain (Msx-interacting-zinc finger) that affects embryonic viability, vulval development, and body morphology; interacts with GEX-3 in yeast two-hybrid assays.                                                        |    |
| F30F8.1    |          | 178648_s_at | 4.7  | contains similarity to Mus musculus Nuclear factor of activated T cells 5 (T cell transcription factorsNFAT5) (NF-AT5); SW:NFT5_MOUSE                                                                                                                             |    |
| Y37E11AR.5 | ugt-45   | 175194_at   | 4.7  | UDP-glucuronosyl/UDP-glucosyl transferase family member                                                                                                                                                                                                           | Y  |
| F55A12.7   | apm-1    | 193878_s_at | 4.7  | an ortholog of the mu1-II subunit of adaptor protein complex 1 (AP-1).                                                                                                                                                                                            |    |
| C01B7.4    | tag-117  | 189538_s_at | 4.7  | guanylate kinase                                                                                                                                                                                                                                                  |    |
| T23B7.1    | nspd-4   | 172486_x_at | 4.6  | Nematode Specific Peptide family, group D                                                                                                                                                                                                                         |    |
| F20A1.6    |          | 181821_at   | 4.6  |                                                                                                                                                                                                                                                                   | Y  |
| F46F3.1    | ceh-27   | 192317_at   | 4.6  | ceh-27 encodes a homeodomain protein of the NK-2 class that contains <i>Drosophila</i> scarecrow and human NKX-2 (OMIM:606727)                                                                                                                                    |    |
| C03G6.17   |          | 185999_at   | 4.6  | Acyl-CoA N-acyltransferase                                                                                                                                                                                                                                        |    |
| C24H12.5   |          | 187836_s_at | 4.6  | Immunoglobulin/major histocompatibility complex, conserved site                                                                                                                                                                                                   |    |
| D1086.3    |          | 177920_at   | 4.6  | Protein of unknown function DUF19; Uncharacterised conserved protein UPF0376                                                                                                                                                                                      | Y  |
| T19D7.5    |          | 180442_at   | 4.6  | integral membrane protein                                                                                                                                                                                                                                         | Y  |
| Y42G9A.2   |          | 184890_at   | 4.5  |                                                                                                                                                                                                                                                                   | Y  |
| R08E5.2    |          | 189653_s_at | 4.5  | cysteine synthase                                                                                                                                                                                                                                                 |    |
| F08G2.6    | ins-37   | 188047_at   | 4.5  | ins-37 encodes an insulin-like peptide.                                                                                                                                                                                                                           | Y  |
| Y37H2A.6   | fbxa-211 | 182392_at   | 4.5  | a protein containing an F-box and an FTH/DUF38 motif                                                                                                                                                                                                              |    |
| F26D11.5   | clcc-216 | 185946_at   | 4.5  | C-type lectin; C-type lectin fold                                                                                                                                                                                                                                 | Y  |
| C03E10.5   | clcc-223 | 182545_at   | 4.5  | C-type lectin, Collagen triple helix repeat (20 copies), Proline-rich region                                                                                                                                                                                      | Y  |
| F32H2.5    | fasn-1   | 174796_at   | 4.5  | fatty acid synthase, orthologous to human FASN (OMIM:600212)                                                                                                                                                                                                      |    |
| Y105C5B.6  | srv-15   | 184967_at   | 4.5  | srv-15, serpentine Receptor, class V                                                                                                                                                                                                                              | Y  |
| C28C12.4   |          | 185803_at   | 4.5  | contains similarity to Pfam domain PF02520 Domain of unknown function DUF148 contains similarity to Interpro domain IPR003677 (Protein of unknown function DUF148)                                                                                                | Y  |

Bacaj *et al.* Supporting Online Material

| Gene name | Locus    | Affy Probe  | Fold | Description                                                                                                                                                                                             | TM |
|-----------|----------|-------------|------|---------------------------------------------------------------------------------------------------------------------------------------------------------------------------------------------------------|----|
| C34G6.2   | tyr-4    | 184158_at   | 4.4  | Tyrosinase; Metridin-like ShK toxin                                                                                                                                                                     | Y  |
| C16B8.3   |          | 182754_at   | 4.4  | Proline-rich region; Annexin, type VII                                                                                                                                                                  |    |
| T17H7.4   | gei-16   | 174770_at   | 4.4  | similar to the B20 antigen of the parasitic nematode <i>Onchocerca volvulus</i> ; GEI-16 is required for ventral enclosure and elongation, larval development, and normal rates of postembryonic growth |    |
| T10E9.3   |          | 183913_s_at | 4.4  | contains similarity to Pfam domain PF03351 DOMON                                                                                                                                                        | Y  |
| Y38F2AL.1 | nsy-4    | 177162_at   | 4.4  | claudin homolog that may be required for normal cohesion of apical junctions in epithelia; Y38F2AL.1 is worm-specific, with obvious homologs only in <i>C. elegans</i>                                  | Y  |
| C27B7.5   |          | 190420_at   | 4.4  | Zinc finger, CCHC class                                                                                                                                                                                 |    |
| F36H5.10  |          | 174172_at   | 4.4  | transmembrane protein                                                                                                                                                                                   | Y  |
| W05E10.3  | ceh-32   | 193576_at   | 4.4  | Six/sine oculis-type homeodomain protein most closely related to the Six3/6 subfamily that contains <i>Drosophila</i> OPTIX and human SIX3 (holoprosencephaly 2)                                        |    |
| F56H6.2   |          | 177630_at   | 4.4  | Protein of unknown function DUF268, <i>Caenorhabditis</i> species                                                                                                                                       | Y  |
| C01B7.5   |          | 180705_at   | 4.4  | PDZ domain (Also known as DHR or GLGF)                                                                                                                                                                  |    |
| R03G5.2   | sek-1    | 192392_at   | 4.4  | SEK-1 has MAPKK activity and belongs to the MAPKK family; SEK-1 can activate both JNK-1 and PMK-1 in the yeast Hog pathway.                                                                             |    |
| K01C8.5   | gei-14   | 188065_s_at | 4.4  | gei-14 encodes a novel protein that interacts with GEX-3 in yeast two-hybrid assays.                                                                                                                    |    |
| C06A8.3   |          | 191204_s_at | 4.4  | Protein of unknown function DUF148; Domain of unknown function DUF148                                                                                                                                   | Y  |
| H08J19.1  |          | 182541_at   | 4.3  | contains similarity to Homo sapiens formin-like 3 isoform 1                                                                                                                                             |    |
| T01D1.1   |          | 181722_s_at | 4.3  | conserved protein, contains double-stranded beta-helix domain, similar to IPR004313 (Acireductone dioxygenase, ARD), IPR014710 (RmlC-like jelly roll fold)                                              |    |
| F38A5.3   | lec-11   | 175705_s_at | 4.3  | Galectin, galactose-binding lectin; Concanavalin A-like lectin/glucanase                                                                                                                                | Y  |
| B0353.1   |          | 187251_at   | 4.3  | contains similarity to <i>Synechocystis</i> sp Serine/threonine-protein kinase C                                                                                                                        |    |
| Y50D4B.2  |          | 176337_at   | 4.3  | contains similarity to Homo sapiens Probable saccharopine dehydrogenase                                                                                                                                 |    |
| F21A9.2   |          | 189958_at   | 4.3  | Zinc finger, C2H2-like                                                                                                                                                                                  |    |
| F52H3.5   |          | 179402_at   | 4.3  | TPR repeat containing protein                                                                                                                                                                           |    |
| C46H11.4  | lfe-2    | 176895_s_at | 4.3  | inositol (1,4,5) triphosphate-3-kinase (IP3K); lfe-2 activity is required negative regulation of the LET-23 signaling pathway                                                                           |    |
| Y22D7AR.3 |          | 176340_at   | 4.3  |                                                                                                                                                                                                         |    |
| C47B2.1   | fbxa-140 | 178679_at   | 4.3  | protein containing an F-box and an FTH/DUF38 motif                                                                                                                                                      | Y  |

Bacaj *et al.* Supporting Online Material

| Gene name  | Locus    | Affy Probe  | Fold | Description                                                                                                                                                  | TM |
|------------|----------|-------------|------|--------------------------------------------------------------------------------------------------------------------------------------------------------------|----|
| Y34D9A.10  | vps-4    | 172130_at   | 4.3  | AAA ATPase, core; MIT;Vps4 oligomerization, C-terminal; MIT (microtubule interacting and transport) domain                                                   |    |
| F39B2.10   | dnj-12   | 175394_at   | 4.2  | contains a DnaJ domain, a prokaryotic heat shock protein                                                                                                     |    |
| Y46H3A.3   | hsp-16.2 | 188282_at   | 4.2  | heat shock protein (hsp-16.2)                                                                                                                                |    |
| F26A1.3    |          | 189149_at   | 4.2  | Protein kinase                                                                                                                                               |    |
| C27D6.4    |          | 188956_at   | 4.2  | bZIP-1, Basic leucine zipper; cAMP response element binding (CREB) protein;Transcription factor Jun;Eukaryotic transcription factor, Skn-1-like, DNA-binding |    |
| ZC239.2    |          | 181917_at   | 4.2  | Polymerase delta-interacting protein PDIP1 and related proteins, contain BTB/POZ domain                                                                      |    |
| R07B1.4    | gst-36   | 191221_at   | 4.2  | glutathione S-transferase                                                                                                                                    |    |
| Y55B1AL.1  |          | 187111_at   | 4.2  |                                                                                                                                                              |    |
| C33C12.4   |          | 185158_s_at | 4.2  | putative membrane protein                                                                                                                                    | Y  |
| F38A3.2    | ram-2    | 194252_x_at | 4.2  | ram-2 encodes a cuticle collagen that interacts with unc-6 to affect ray cell migration, and interacts with unc-5 and unc-6 to affect embryonic viability    | Y  |
| C04F12.11  |          | 188825_s_at | 4.2  | transposon                                                                                                                                                   |    |
| Y105E8A.16 | rps-20   | 171977_x_at | 4.1  | rps-20 encodes a small ribosomal subunit S20 protein.                                                                                                        |    |
| F09E10.11  | tts-1    | 174073_at   | 4.1  | non-coding RNA transcript of unknown function                                                                                                                |    |
| F19B10.10  |          | 186728_s_at | 4.1  | Predicted E3 ubiquitin ligase                                                                                                                                |    |
| C17G1.5    |          | 179127_s_at | 4.1  |                                                                                                                                                              | Y  |
| C02D4.2    | ser-2    | 190313_at   | 4.1  | tyramine 7-TM Domain receptor (GPCR)                                                                                                                         | Y  |
| F53A9.6    |          | 172363_x_at | 4.1  | contains similarity to Interpro domains IPR002952 (Eggshell protein), IPR002395 (HMW kinogen)                                                                |    |
| C30G12.6   |          | 187628_s_at | 4.1  | Armadillo-type fold                                                                                                                                          |    |
| F31A3.3    |          | 180056_at   | 4.1  |                                                                                                                                                              |    |
| K09F6.6    |          | 181370_s_at | 4.1  | Small secreted protein with conserved cysteines                                                                                                              |    |
| F54E7.6    |          | 182110_at   | 4.0  |                                                                                                                                                              | Y  |
| H25P19.1   |          | 175038_at   | 4.0  |                                                                                                                                                              |    |
| Y39B6A.47  | nhr-145  | 183498_s_at | 4.0  | nuclear hormone receptor                                                                                                                                     |    |
| C33A12.15  | ttr-9    | 191296_at   | 4.0  | Transthyretin-like family                                                                                                                                    | Y  |
| C48B4.2    | rom-2    | 188662_at   | 4.0  | contains similarity to Pfam domains PF01694 (Rhomboid family) , PF00036 (EF hand)                                                                            | Y  |
| Y57G11C.24 | eps-8    | 193793_s_at | 4.0  | eps-8 is predicted to encode five protein isoforms with similarity to mouse epidermal growth factor receptor kinase substrate                                |    |
| R07B7.10   |          | 191927_at   | 4.0  | Mitochondrial substrate carrier;Mitochondrial carrier protein;Adenine nucleotide translocator 1                                                              | Y  |
| F58G1.4    | dct-18   | 177978_at   | 4.0  | Endoplasmic reticulum, targeting sequence                                                                                                                    | Y  |
| ZK675.1    | ptc-1    | 192536_at   | 4.0  | an ortholog of Drosophila PATCHED (PTC) and human PTCH, transmembrane protein                                                                                | Y  |

**Table S2.** *fig-1* activity is required continuously for dye filling. Animals were cultivated on RNAi plates starting from different larval stages and were assayed for dye filling as young adults. In the case of L4 animals, this was 24 h of exposure. n = 50 for each.

| Larval stage      | Normal Dye Filling (%) |         |
|-------------------|------------------------|---------|
|                   | Amphid                 | Phasmid |
| L1 (empty vector) | 100                    | 100     |
| L1                | 80                     | 35      |
| L2                | 85                     | 43      |
| L4                | 100                    | 72      |

**Supporting references and notes**

1. S. Brenner, *Genetics* **77**, 71 (1974).
2. A. A. Beg, E. M. Jorgensen, *Nat. Neurosci.* **6**, 1145 (2003).
3. C. C. Mello, J. M. Kramer, D. Stinchcomb, V. Ambros, *EMBO J.* **10**, 3959 (1991).
4. M. D. Yandell, L. G. Edgar, W. B. Wood, *Proc. Natl. Acad. Sci. U.S.A.* **91**, 1381 (1994).
5. C. I. Bargmann, L. Avery, *Methods Cell Biol.* **48**, 225 (1995).
6. C. I. Bargmann, E. Hartwig, H. R. Horvitz, *Cell* **74**, 515 (1993).
7. S. Ward, *Proc. Natl. Acad. Sci. U.S.A.* **70**, 817 (1973).
8. J. G. Culotti, R. L. Russell, *Genetics* **90**, 243 (1978).
9. W. S. Ryu, A. D. Samuel, *J. Neurosci.* **22**, 5727 (2002).
10. S. H. Chalasani *et al.*, *Nature* **450**, 63 (2007).
11. E. A. Lundquist, P. W. Reddien, E. Hartwig, H. R. Horvitz, C. I. Bargmann, *Development* **128**, 4475 (2001).
12. M. Christensen *et al.*, *Neuron* **33**, 503 (2002).
13. R. M. Fox *et al.*, *BMC Genomics* **6**, 42 (2005).
14. R. S. Kamath *et al.*, *Nature* **421**, 231 (2003).
15. D. M. Miller, 3rd *et al.*, *Biotechniques* **26**, 914 (1999).
16. H. Fares, I. Greenwald, *Genetics* **159**, 133 (2001).
17. E. A. Perens, S. Shaham, *Dev. Cell* **8**, 893 (2005).
18. L. A. Perkins, E. M. Hedgecock, J. N. Thomson, J. G. Culotti, *Dev. Biol.* **117**, 456 (1986).
19. T. Bacaj, Y. Lu, S. Shaham, *Genetics* **178**, 989 (2008).
20. H. Qin, J. L. Rosenbaum, M. M. Barr, *Curr. Biol.* **11**, 457 (2001).
21. P. Sengupta, J. H. Chou, C. I. Bargmann, *Cell* **84**, 899 (1996).
22. H. Komatsu, I. Mori, J. S. Rhee, N. Akaike, Y. Ohshima, *Neuron* **17**, 707 (1996).
